# Supplementary material for: Novel thiohydantoin analogues bearing the 1-hydroxyl-2,2,2-trifluoro-1-ethyl moiety as androgen receptor inhibitors for the potential treatment of castration resistant prostate cancer
Source: Royal Society of Chemistry journal article supplement (doi:10.1039/c7ra02142a), 2017-01-01
Supplement: c7ra02142a1.pdf [file c7ra02142a1.pdf]

## Novel thiohydantoin analogues bearing 1-hydroxyl-2,2,2-trifluoro-1-ethyl moiety as androgen receptor inhibitors for the potential treatment of castration resistant prostate cancer

Yingwei Wang <sup>a,b,†</sup>, Yufang Deng <sup>a,†</sup>, Xuehai Pang <sup>b</sup>, Jiang Yu <sup>a</sup>, Lei Fan <sup>c</sup>, Yuanwei Chen <sup>a,b,c,\*</sup> and Lifeng Zhao <sup>d,\*</sup>

<sup>a</sup> Lab of YW Chen, Cancer Center, West China Hospital, Sichuan University and Collaborative Innovation Center, Chengdu, 610041,

<sup>b</sup> Chengdu Institute of Organic Chemistry, Chinese Academy of Sciences, Chengdu, 610041, China.

<sup>c</sup> Hinova Pharmaceuticals Inc., Suite 402, Building B, #5 South KeYuan Road, Chengdu, 610041, China

<sup>d</sup> Chengdu University, Sichuan Industrial Institute of Antibiotics, Chengdu, 610041, China

\* Corresponding author. Tel.: +86 028 8598 0460; fax: +86 028 8598 0460; e-mail: ywchen@scu.edu.cn.

\* Corresponding author. Tel.: +86 158 8241 1095; fax: +86 028 8505 8465; e-mail: lifengzhao@scu.edu.cn.

† These authors contributed equally.

### Spectroscopic Data of Synthetic Compounds

(400.13 MHz, CDCl<sub>3</sub>)

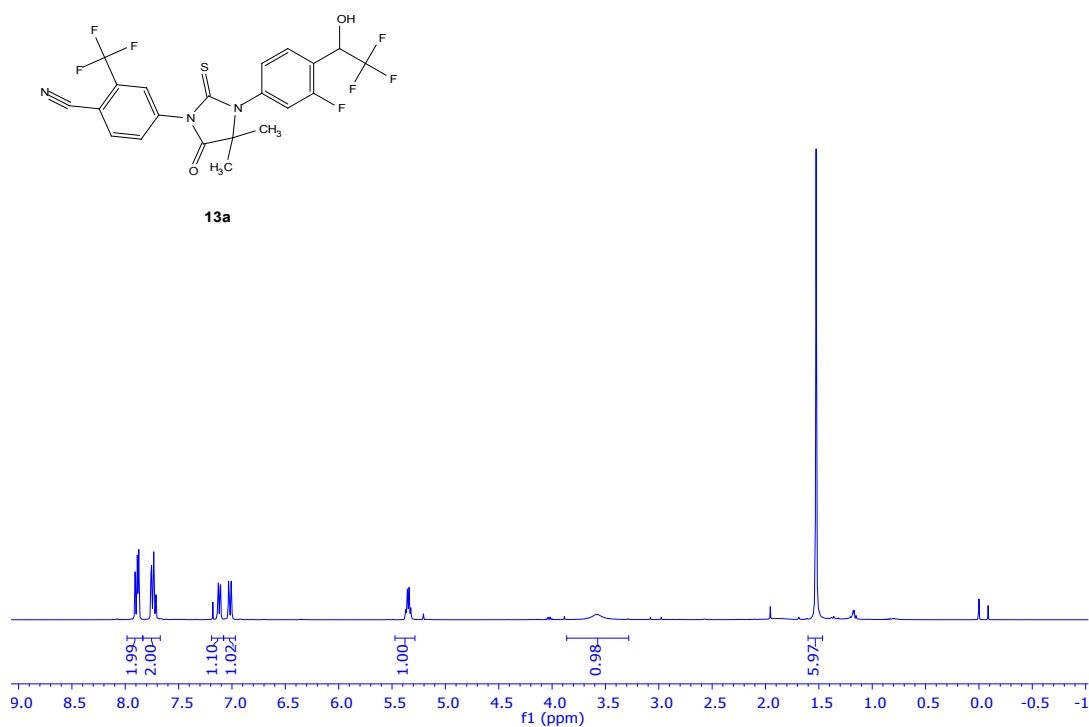

(100.61 MHz, CDCl<sub>3</sub>)

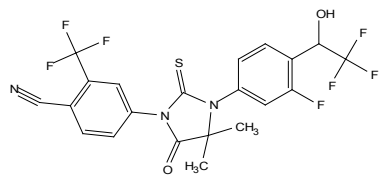

13a

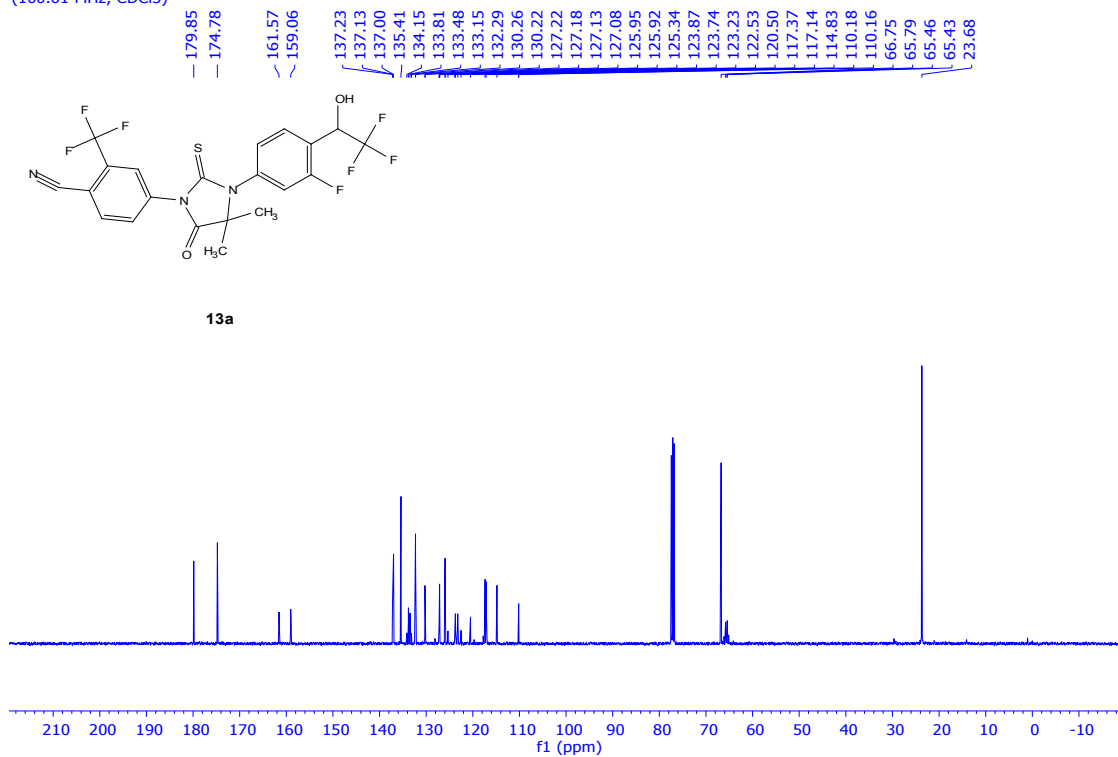

(376.50 MHz, CDCl<sub>3</sub>)

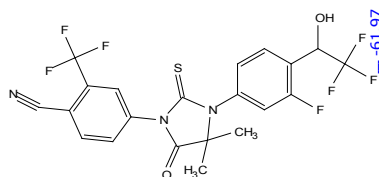

13a

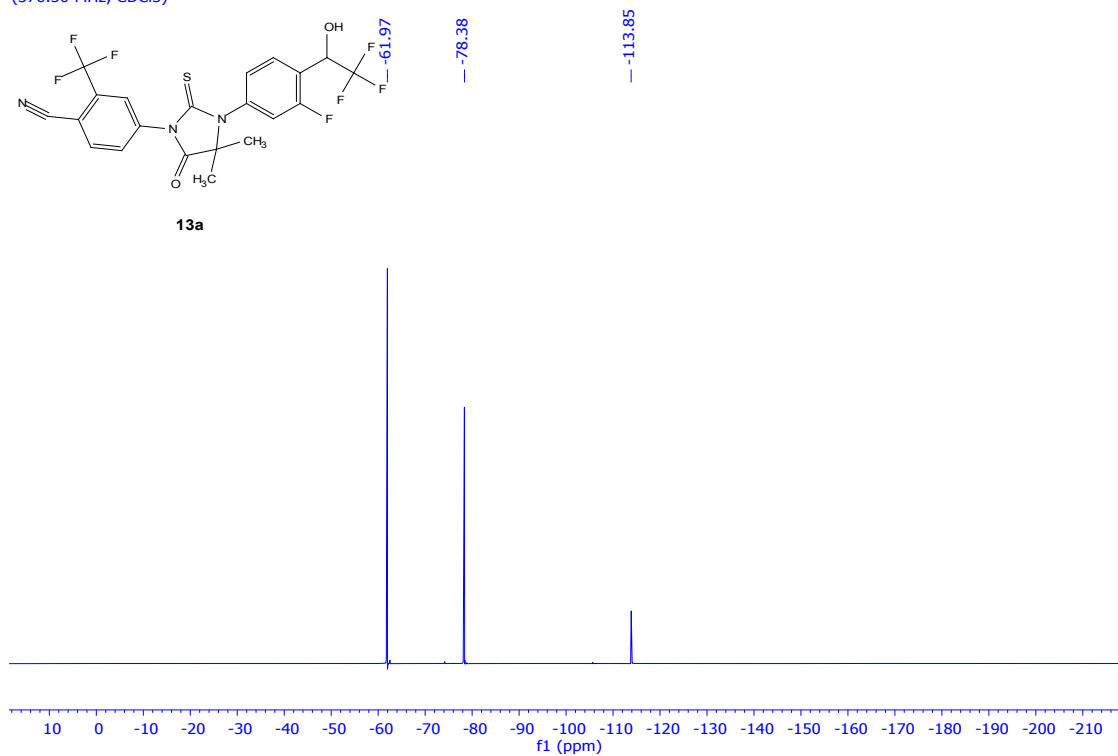

(400.13 MHz, CDCl<sub>3</sub>)

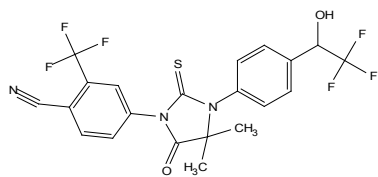

**13b**

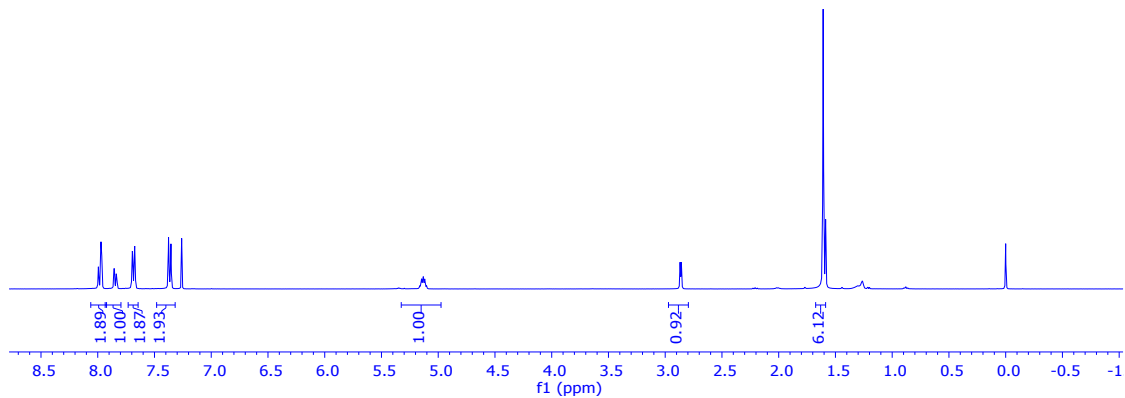

(100.61 MHz, CDCl<sub>3</sub>)

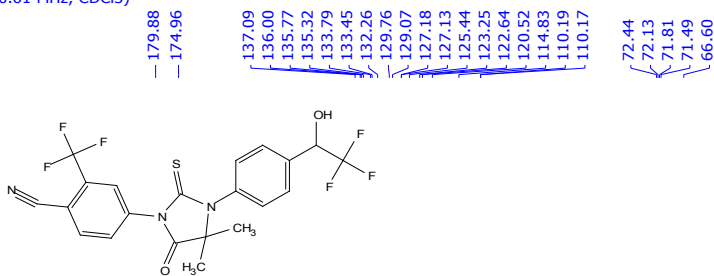

**13b**

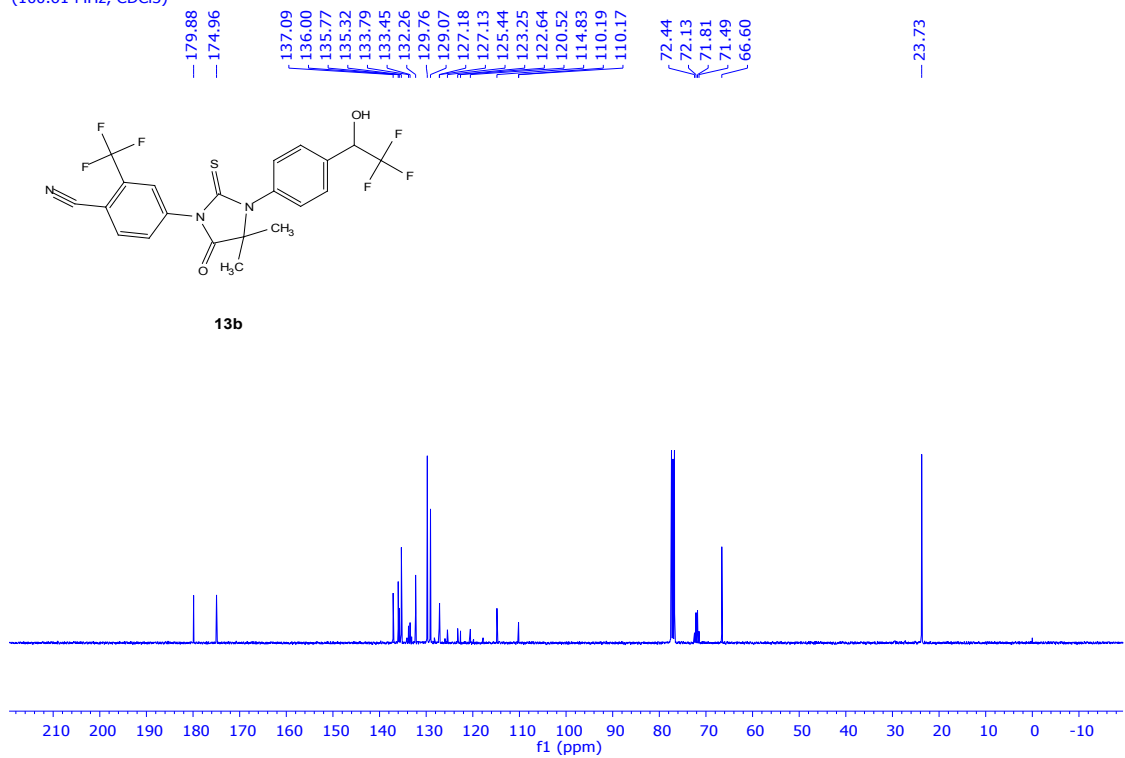

(376.50 MHz, CDCl<sub>3</sub>)

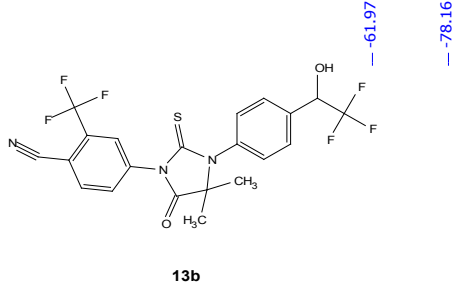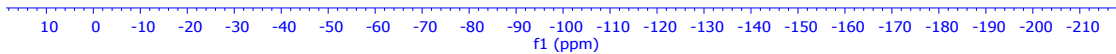

(400.13 MHz, CDCl<sub>3</sub>)

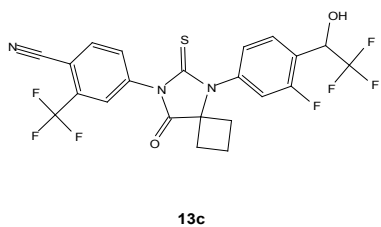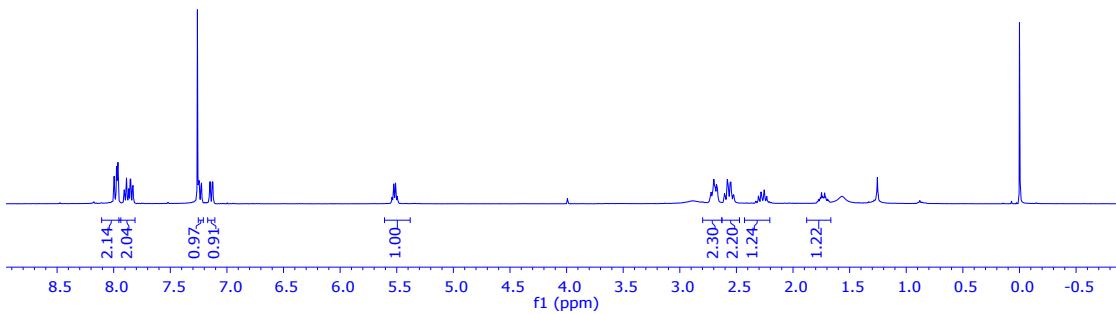

(100.61 MHz, CDCl<sub>3</sub>)

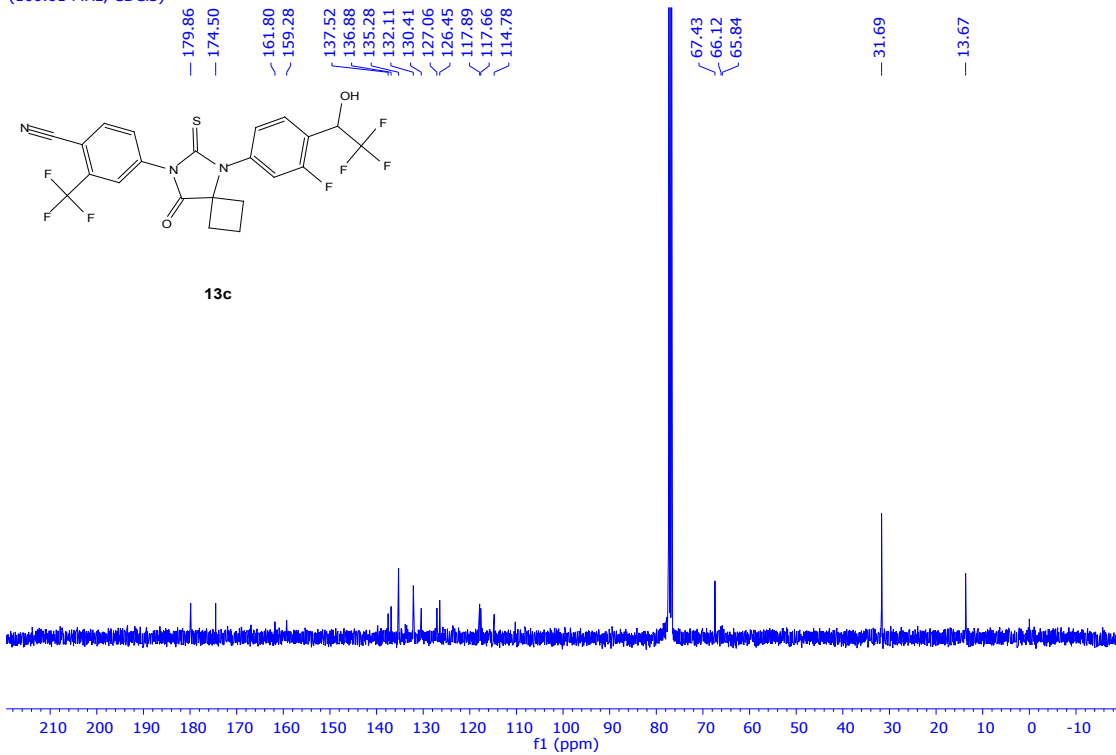

(376.50 MHz, CDCl<sub>3</sub>)

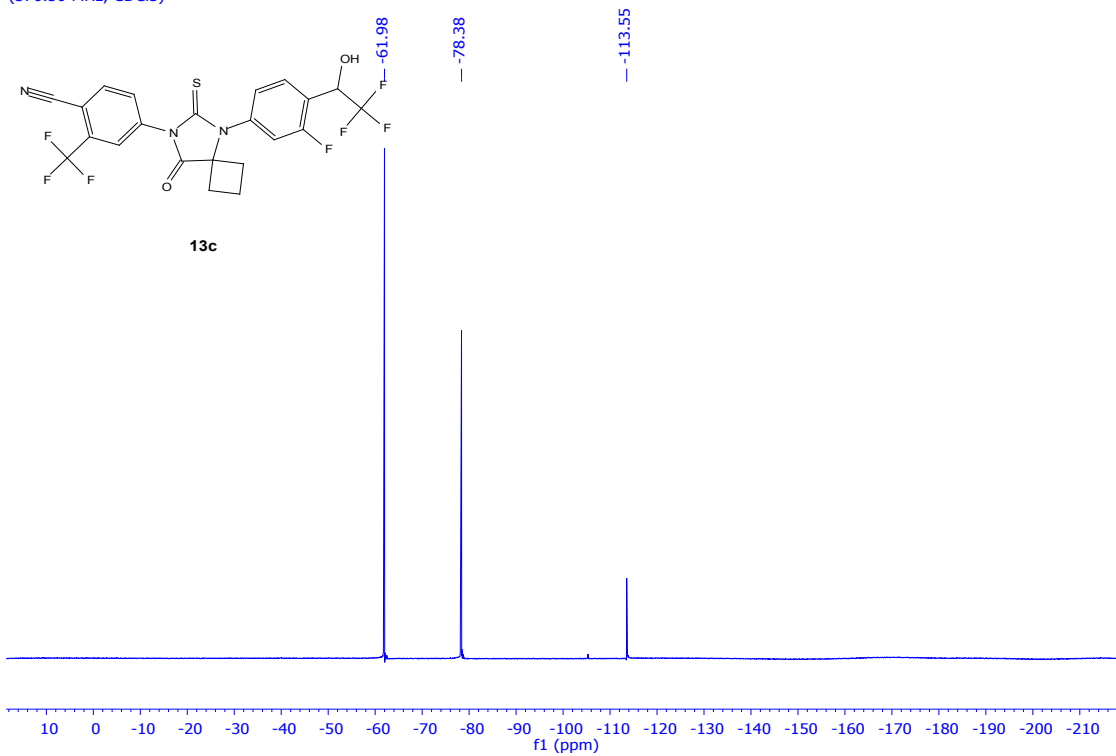

(400.13 MHz, CDCl<sub>3</sub>)

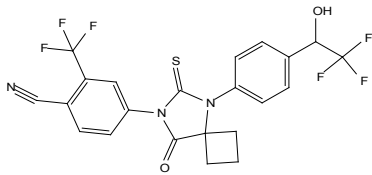

**13d**

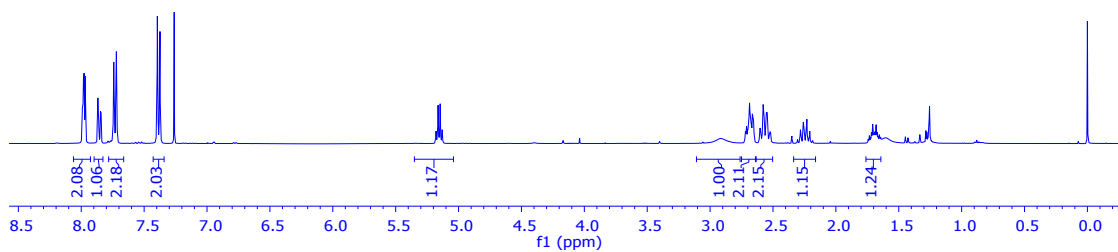

(100.61 MHz, CDCl<sub>3</sub>)

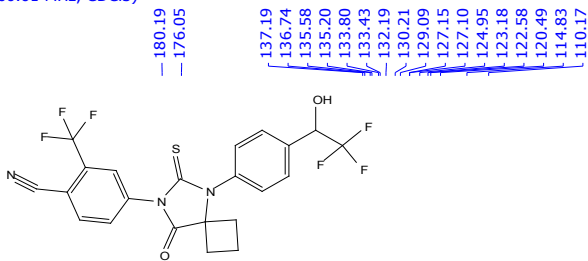

**13d**

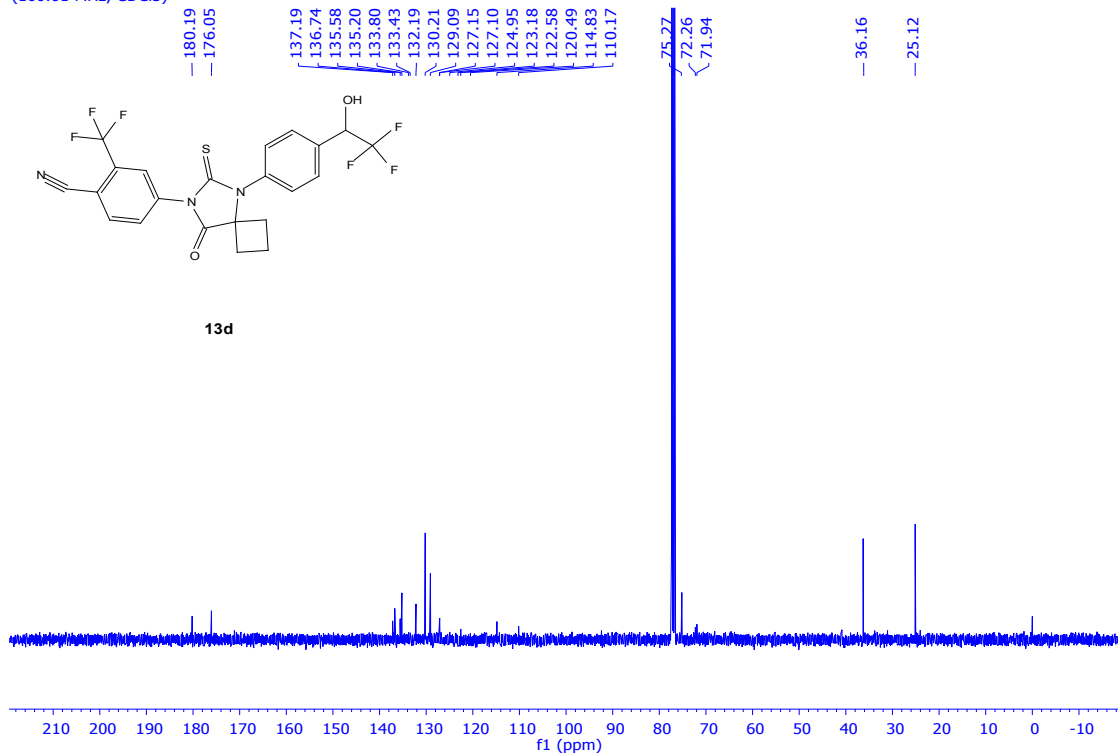

(376.50 MHz, CDCl<sub>3</sub>)

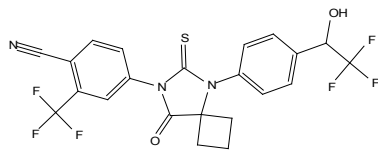

13d

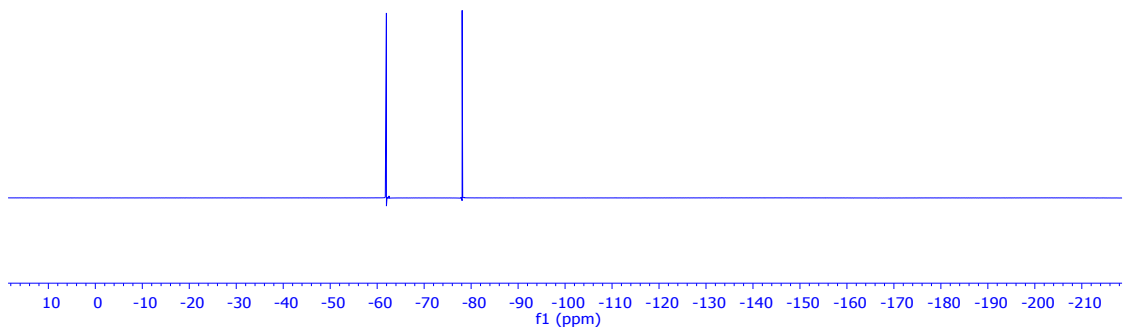

(400.13 MHz, DMSO)

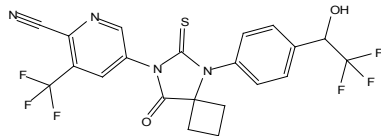

13e

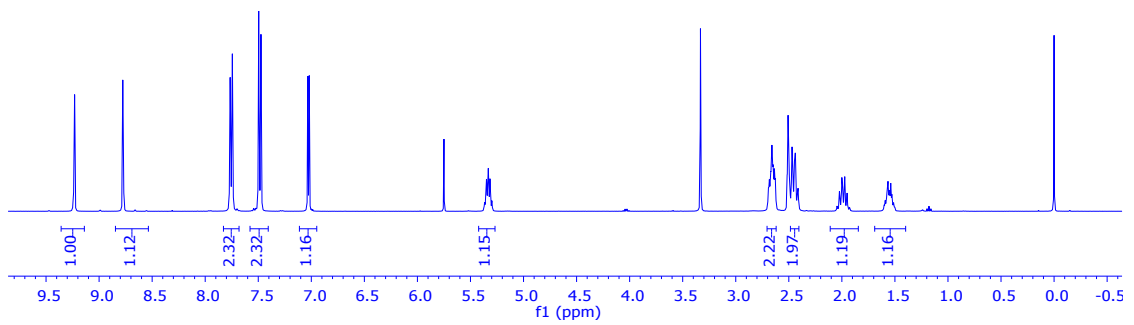

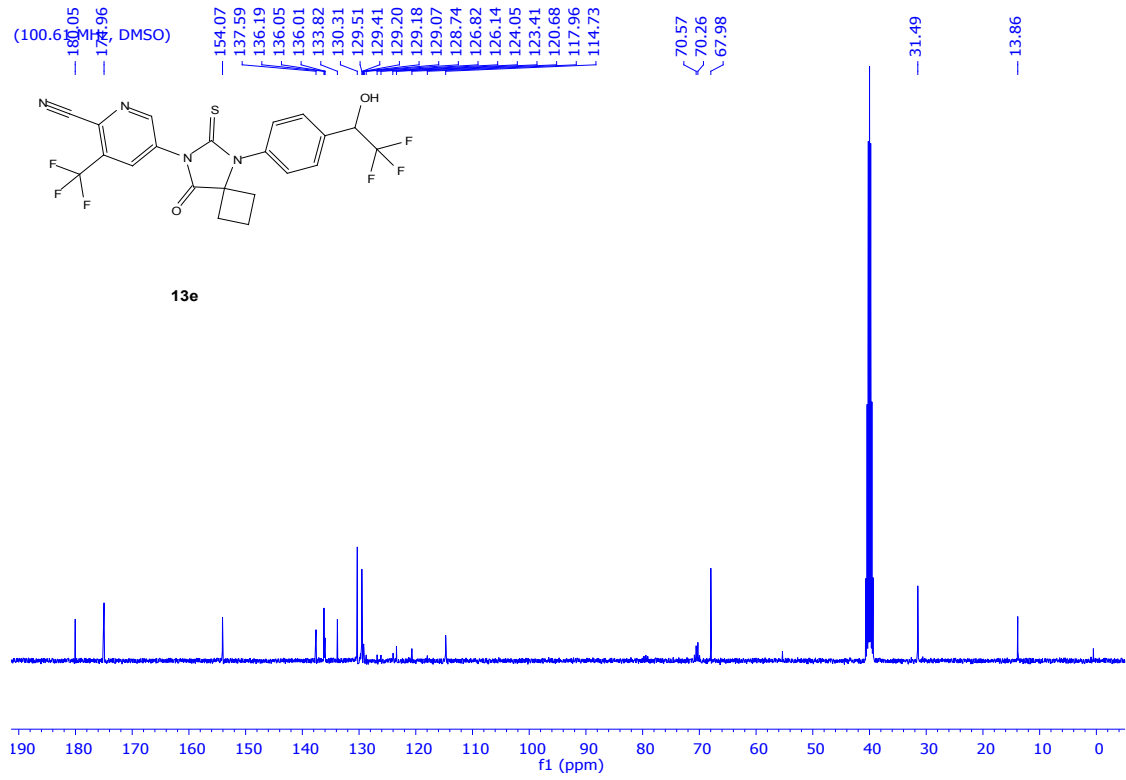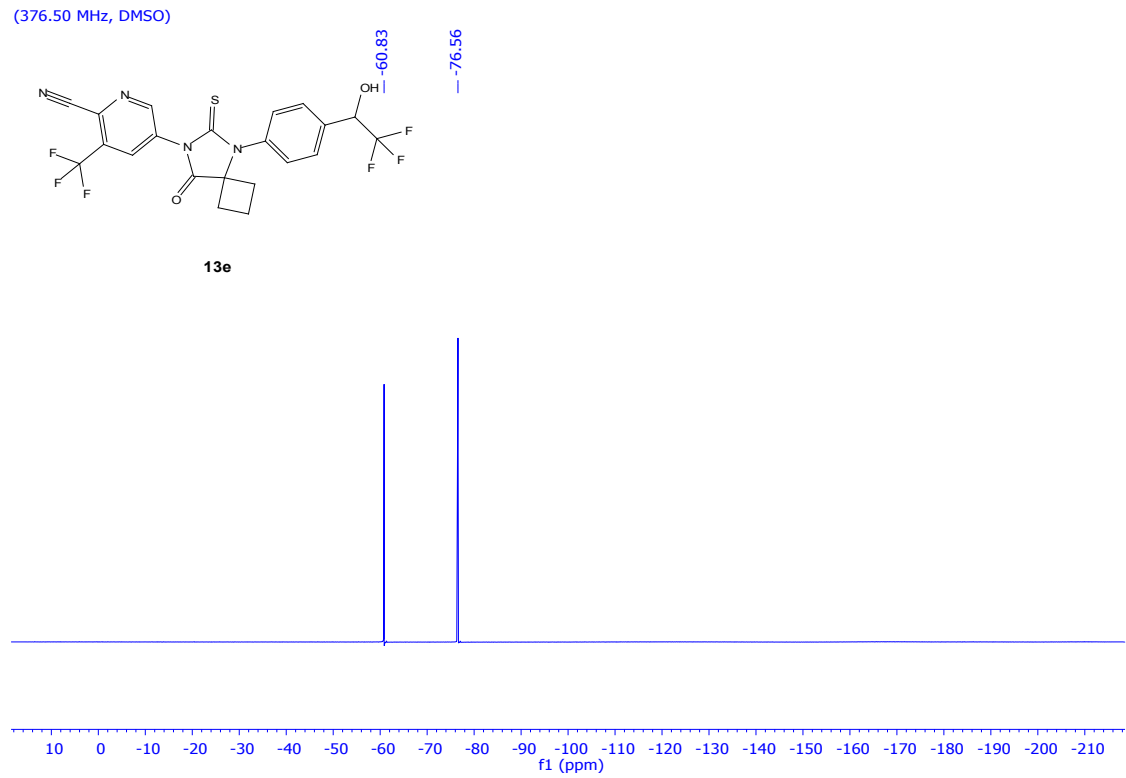



(400.13 MHz, CDCl<sub>3</sub>)

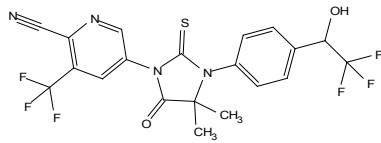

13f

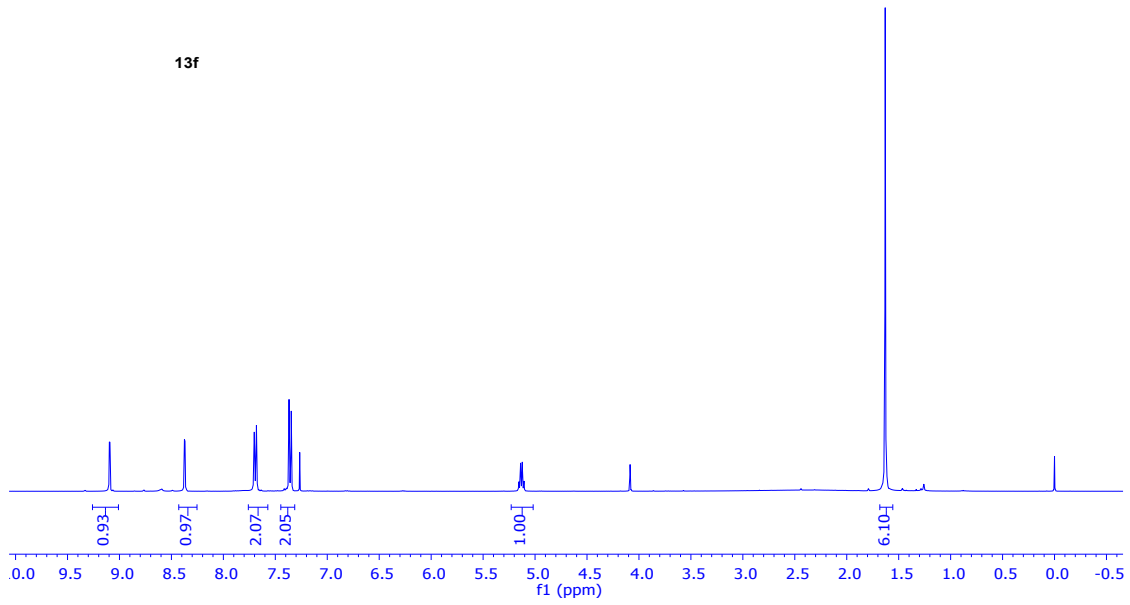

(100.61 MHz, CDCl<sub>3</sub>)

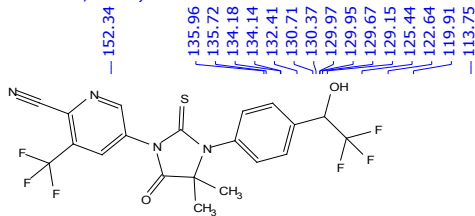

13f

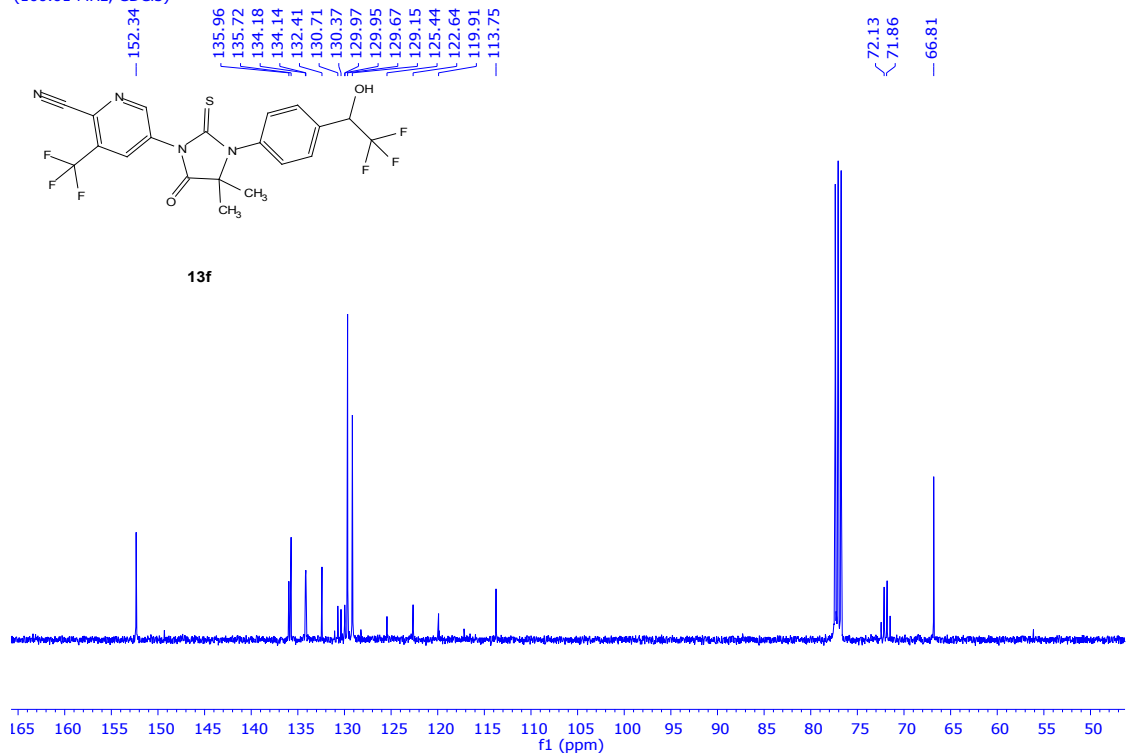

(376.50 MHz, CDCl<sub>3</sub>)

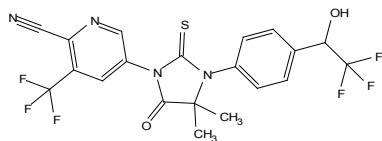

**13f**

— -61.87

— -78.12

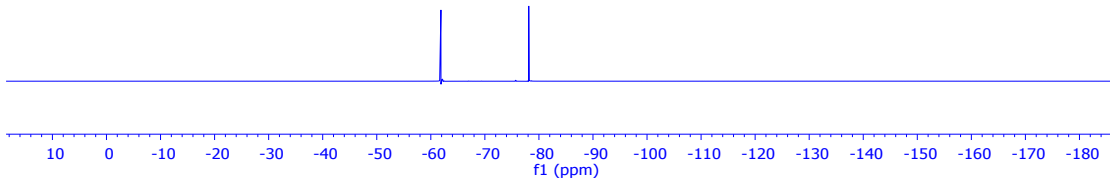

(400.13 MHz, CDCl<sub>3</sub>)

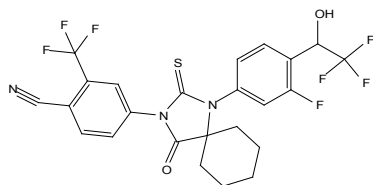

**13g**

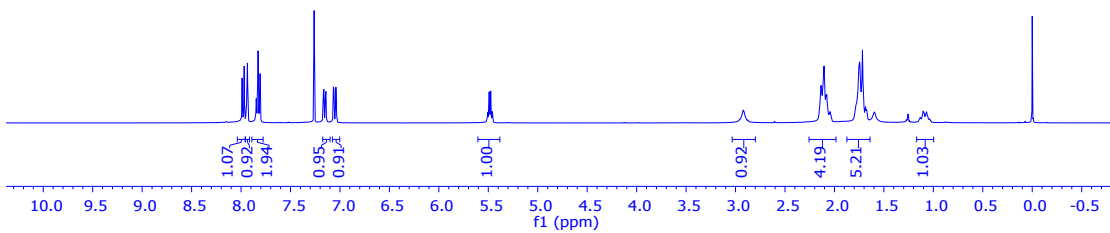

(100.61 MHz, CDCl<sub>3</sub>)

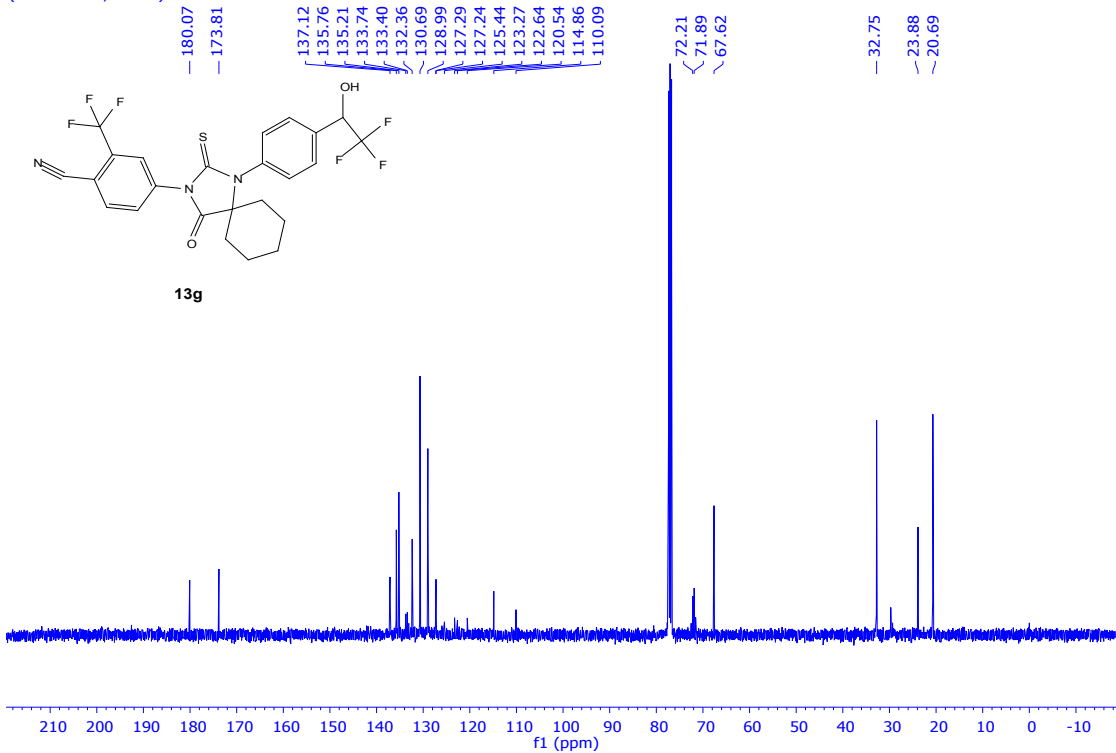

(376.50 MHz, CDCl<sub>3</sub>)

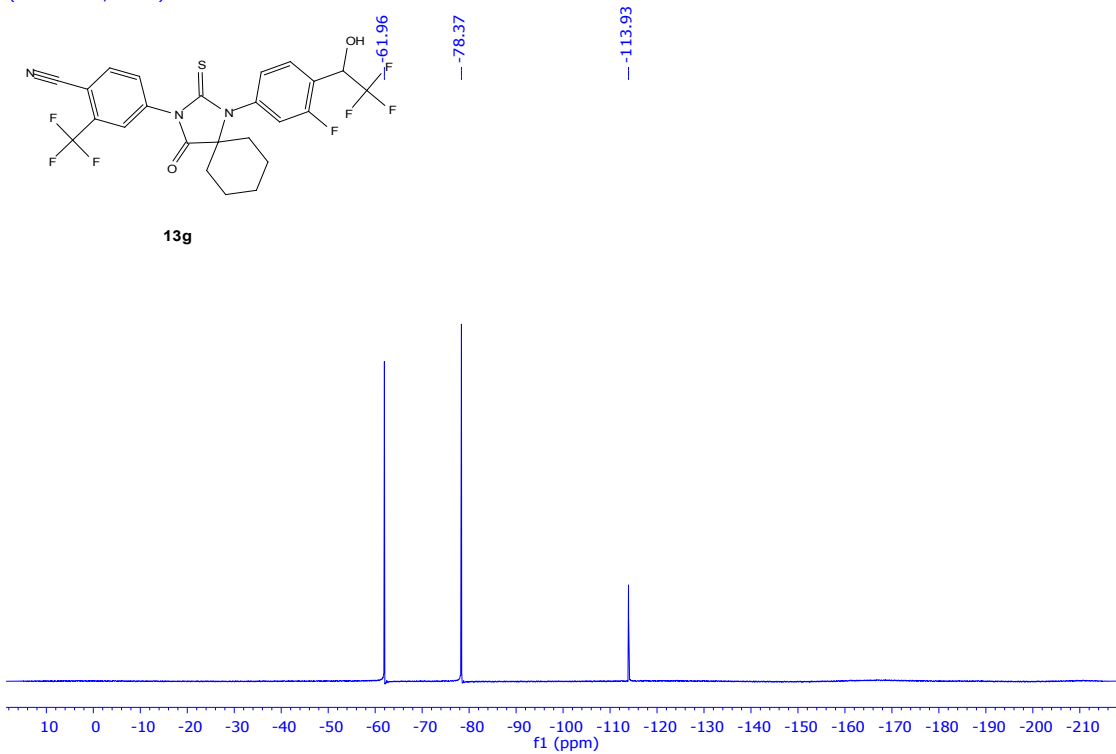

(400.13 MHz, CDCl<sub>3</sub>)

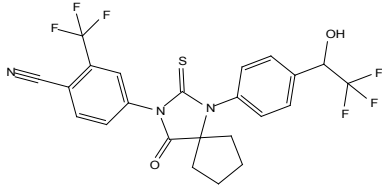

**13h**

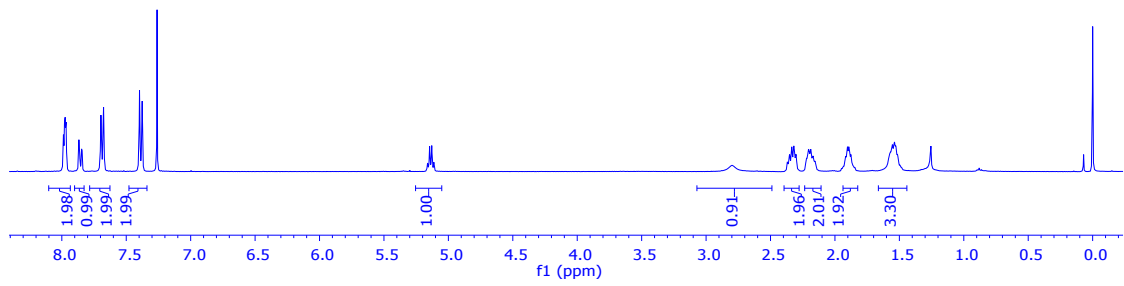

(100.61 MHz, CDCl<sub>3</sub>)

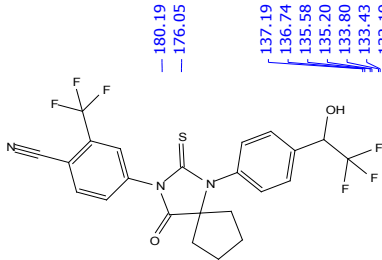

**13h**

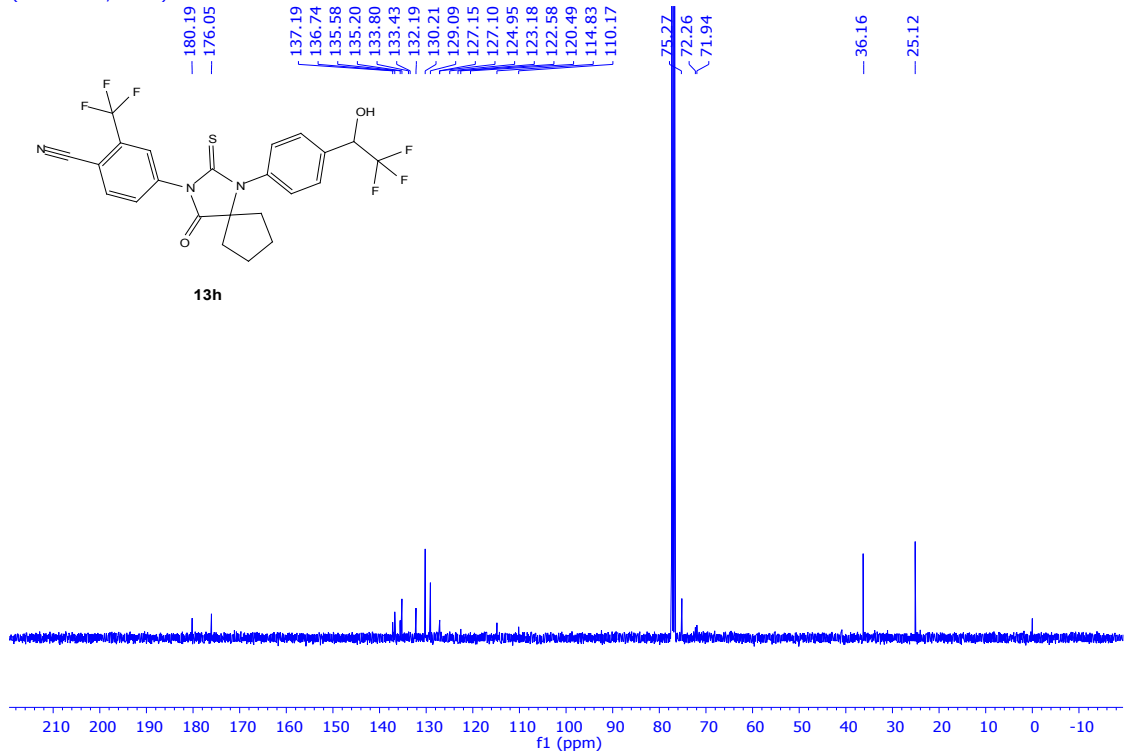

(376.50 MHz, CDCl<sub>3</sub>)

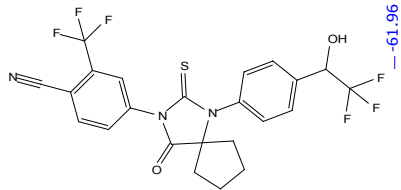

13h

-61.96

-78.19

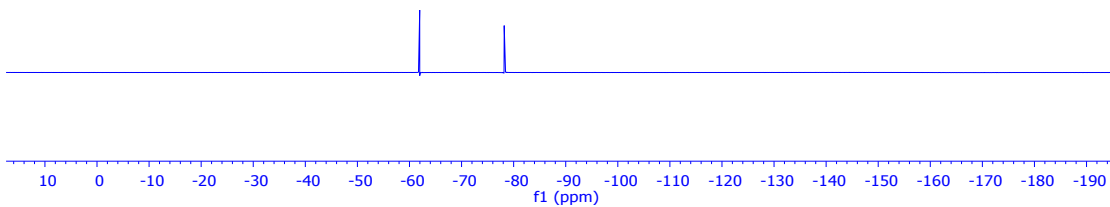

(400.13 MHz, CDCl<sub>3</sub>)

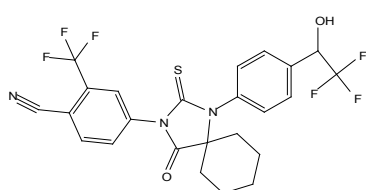

13i

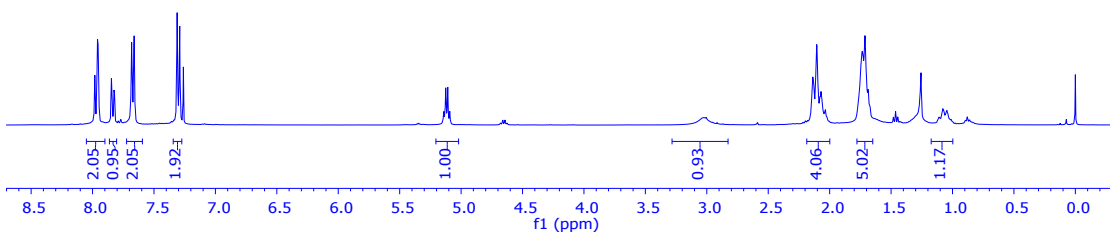

(100.61 MHz, CDCl<sub>3</sub>)

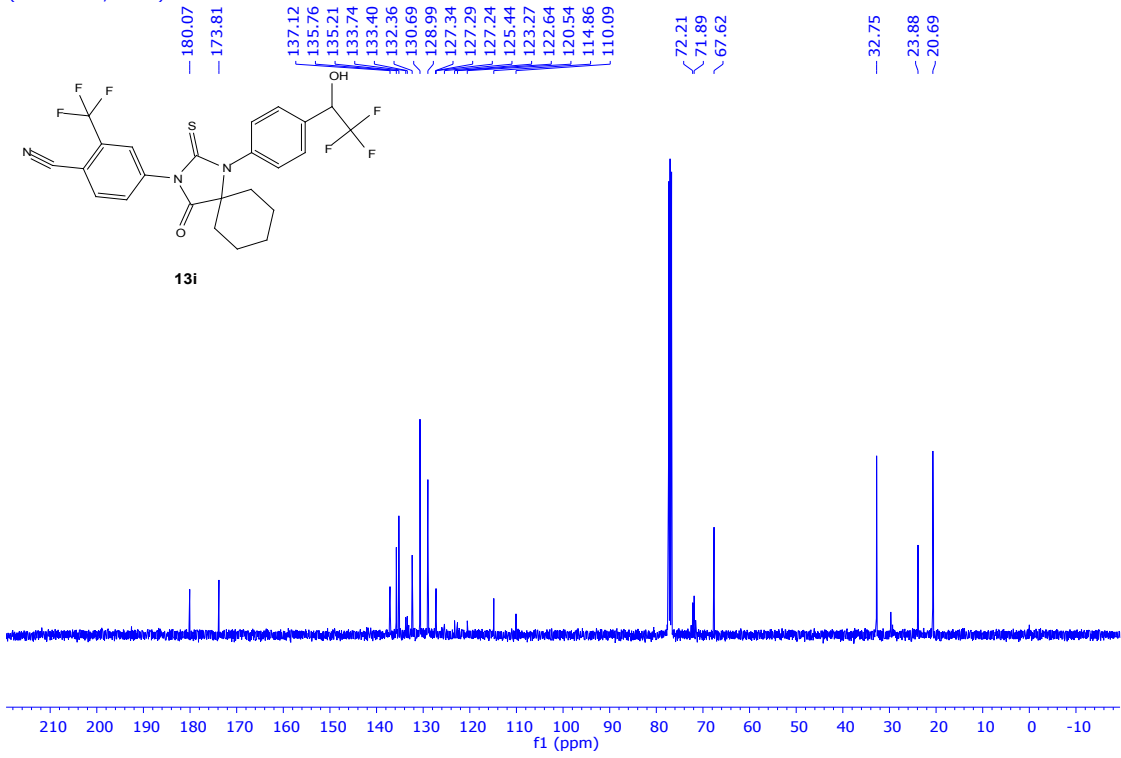

(376.50 MHz, CDCl<sub>3</sub>)

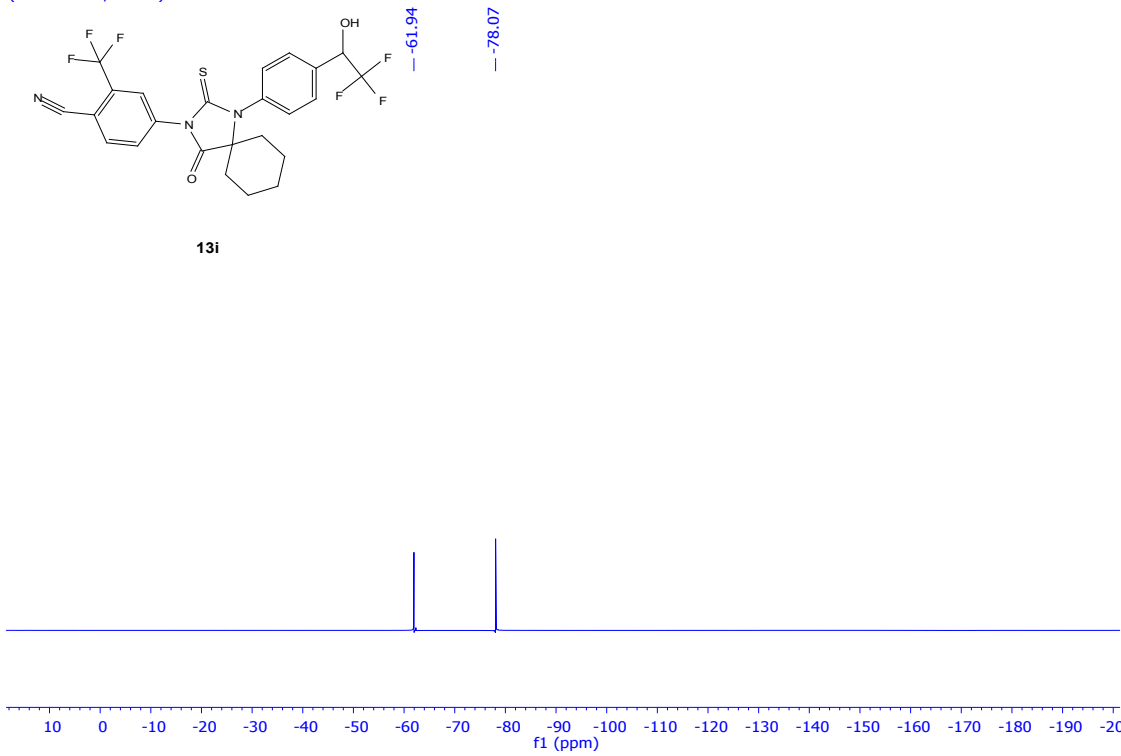

(400.13 MHz, CDCl<sub>3</sub>)

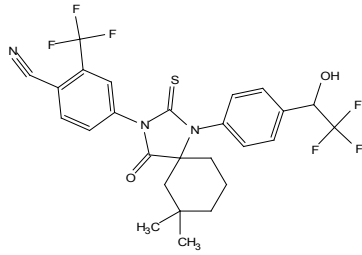

13j

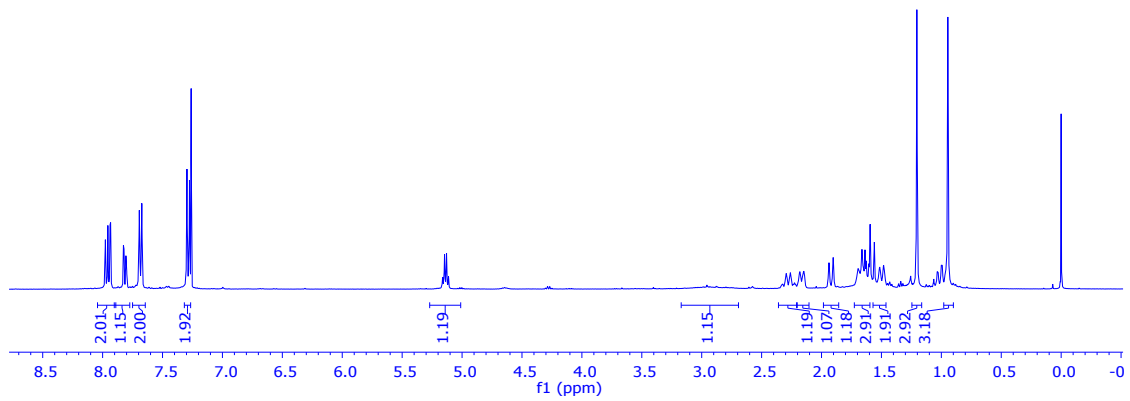

(100.61 MHz, CDCl<sub>3</sub>)

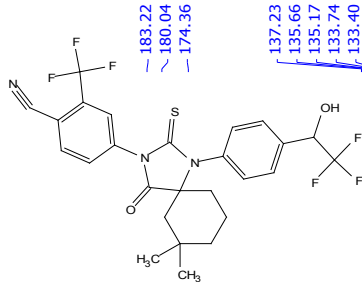

13j

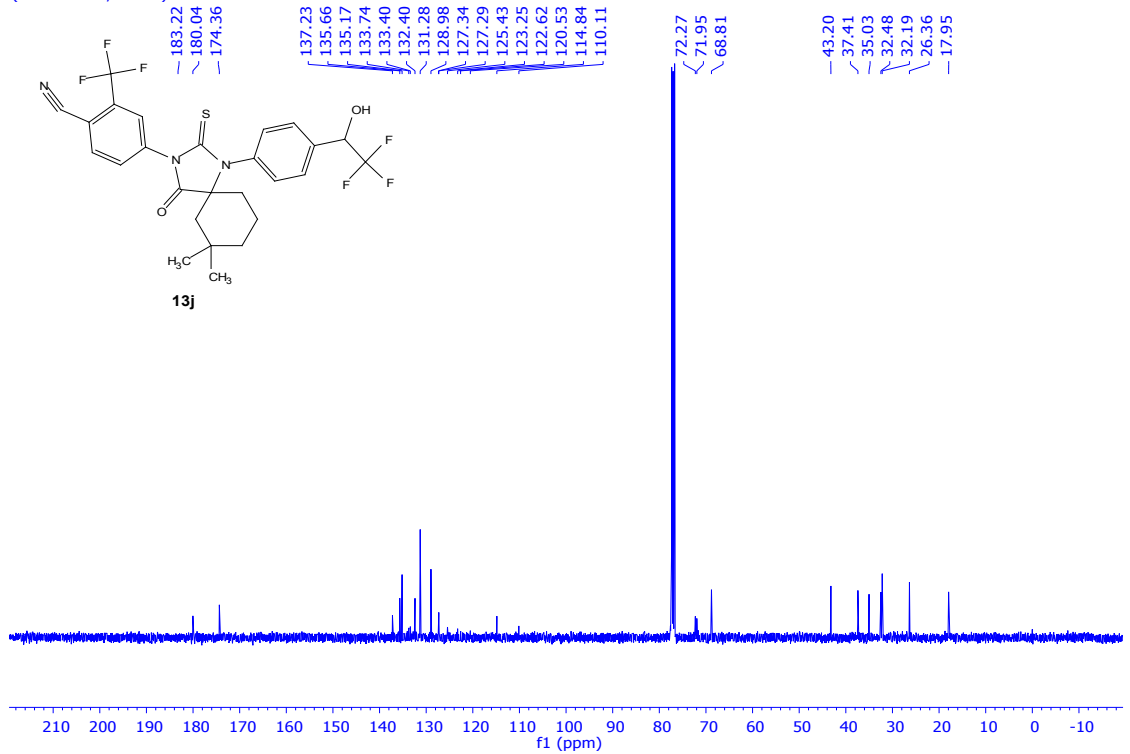

(376.50 MHz, CDCl<sub>3</sub>)

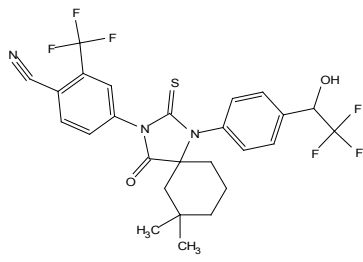

13j

-61.96

-78.04

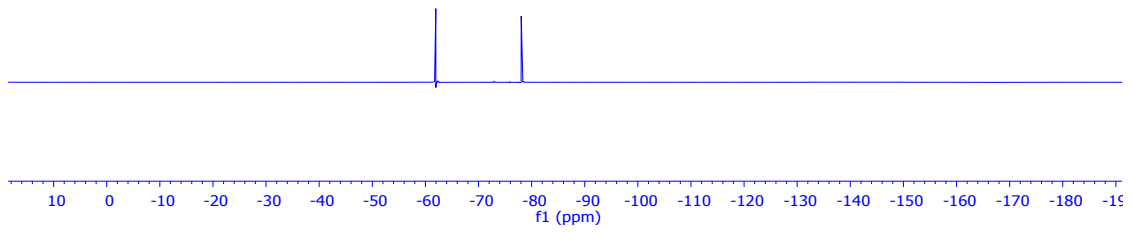

(400.13 MHz, CDCl<sub>3</sub>)

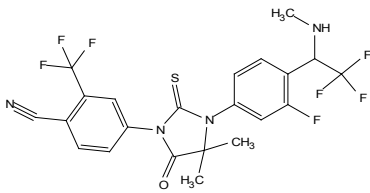

14a

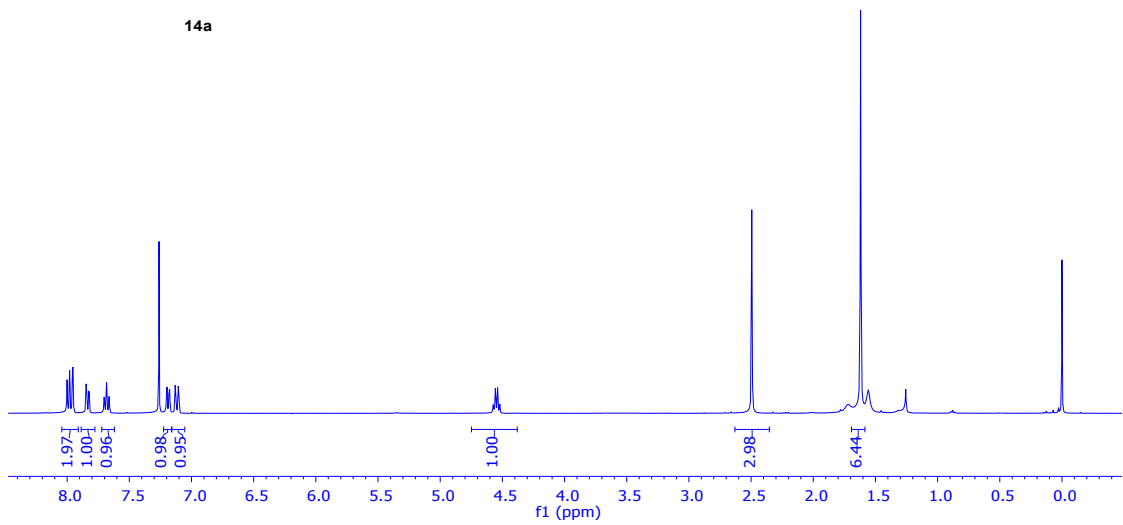



(100.61 MHz, CDCl<sub>3</sub>)

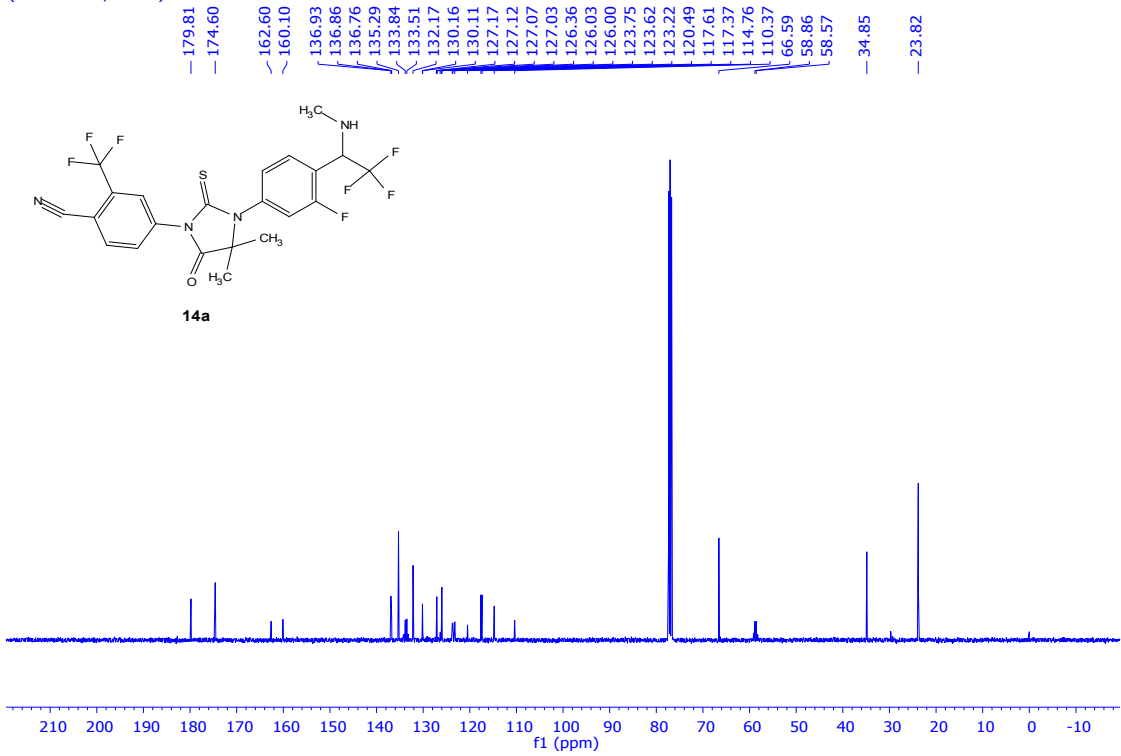

(376.50 MHz, CDCl<sub>3</sub>)

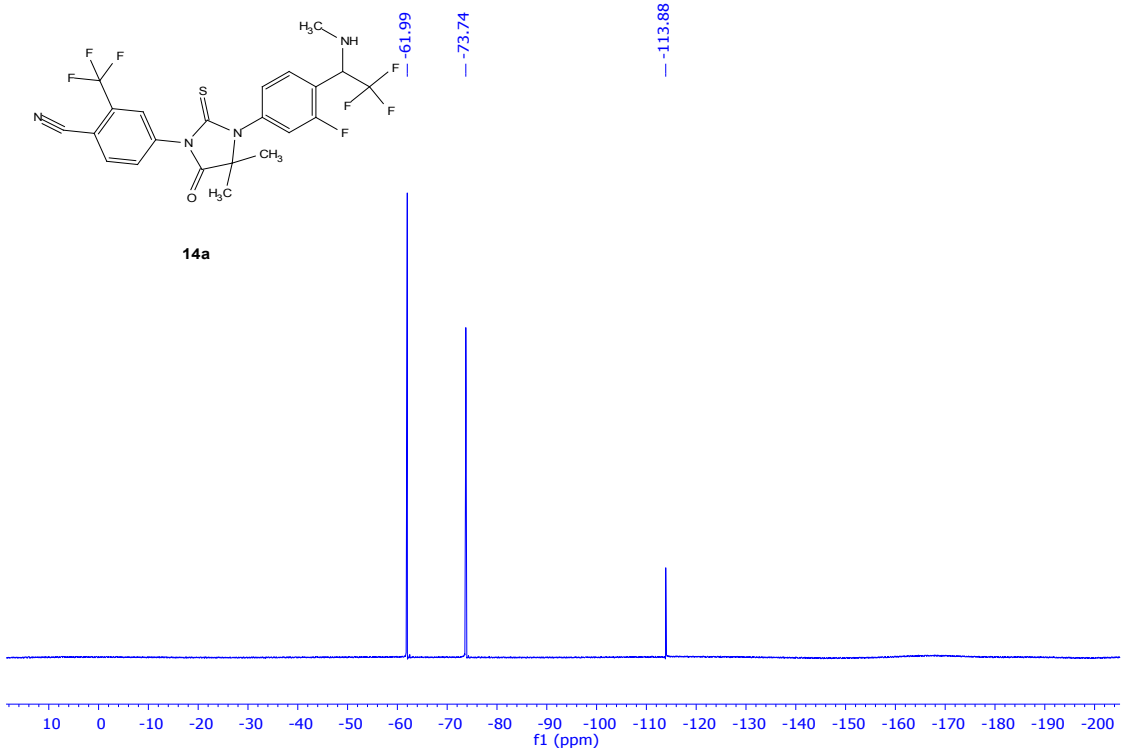

(400.13 MHz, CDCl<sub>3</sub>)

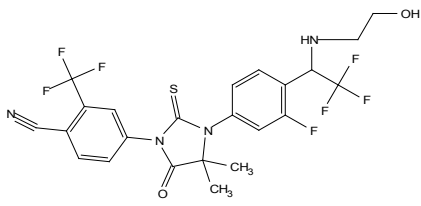

14b

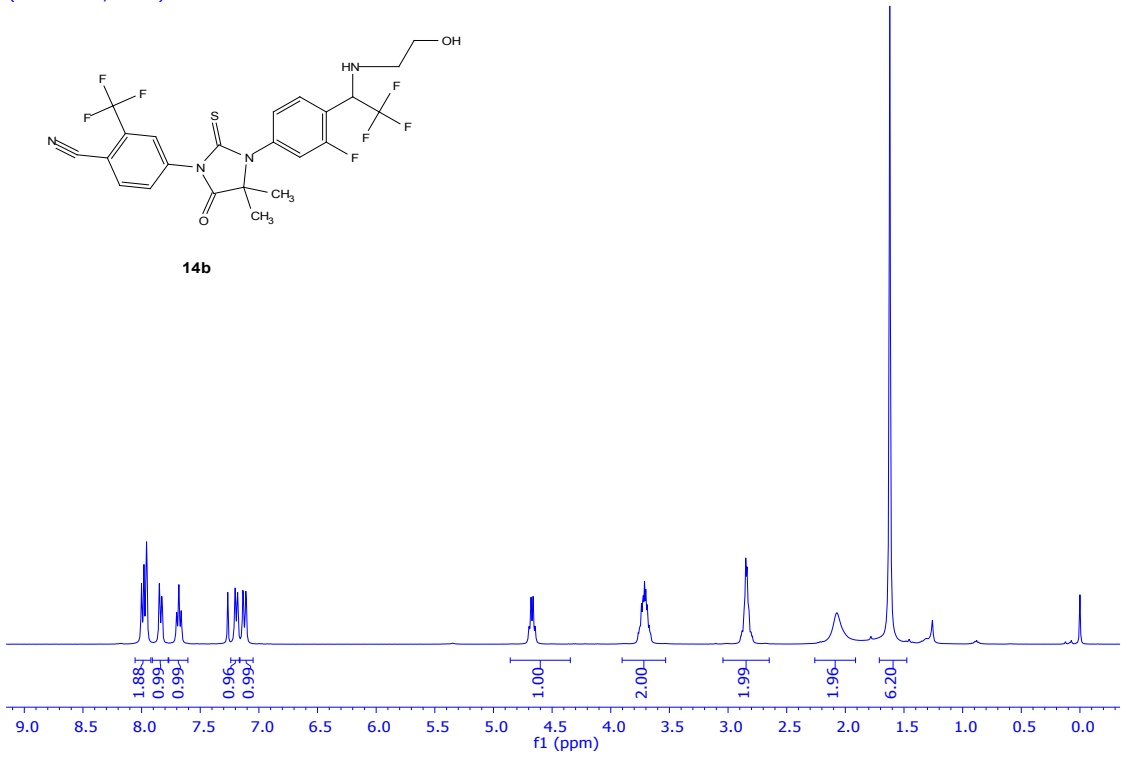

(100.61 MHz, CDCl<sub>3</sub>)

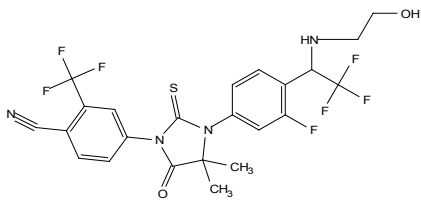

14b

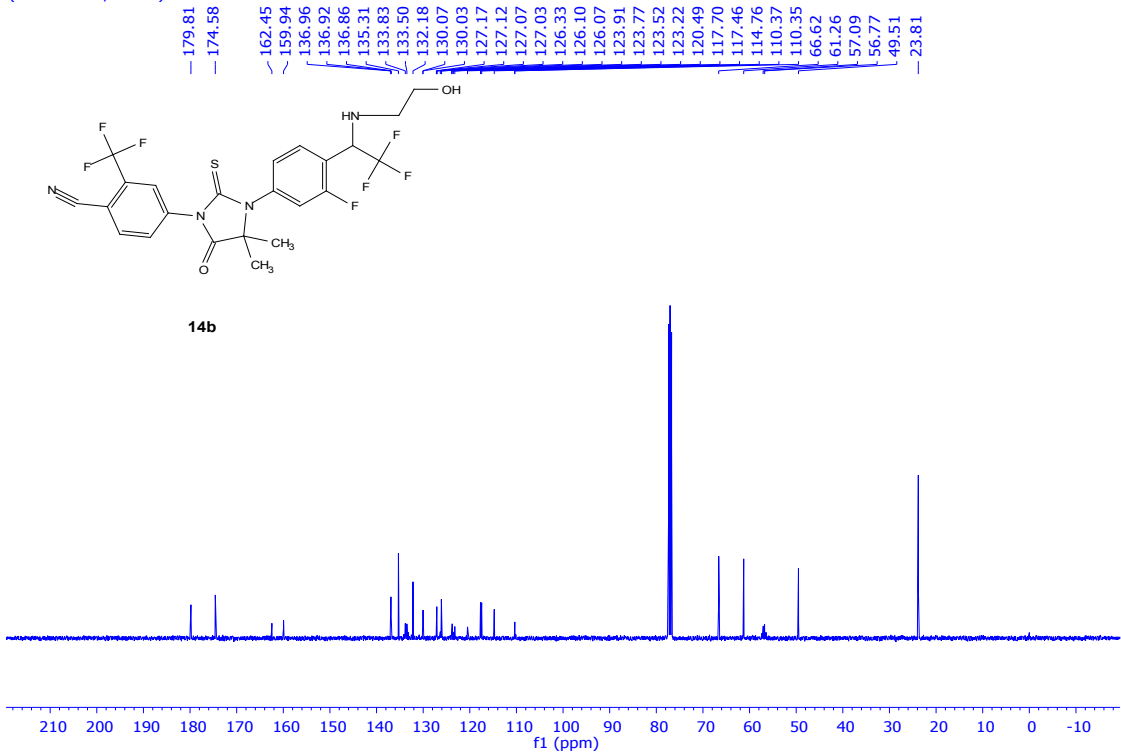

(376.50 MHz, CDCl<sub>3</sub>)

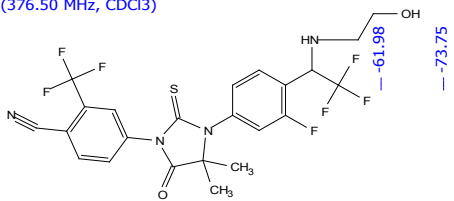

14b

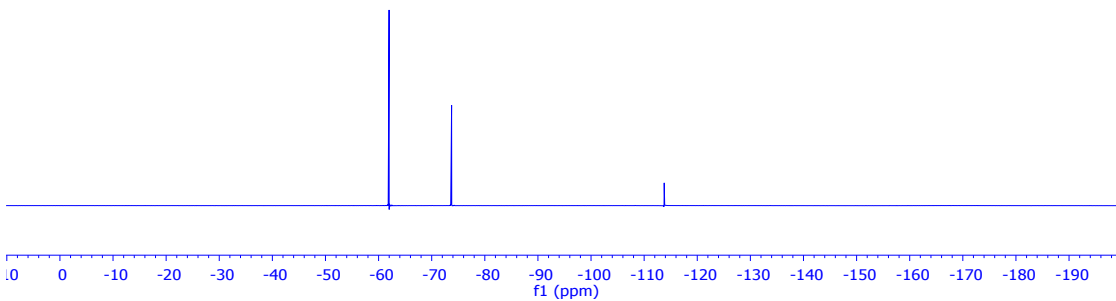

(400.13 MHz, CDCl<sub>3</sub>)

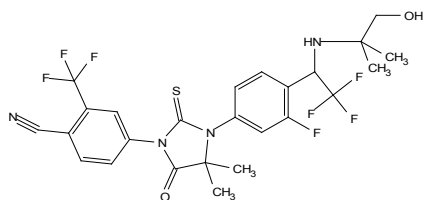

14c

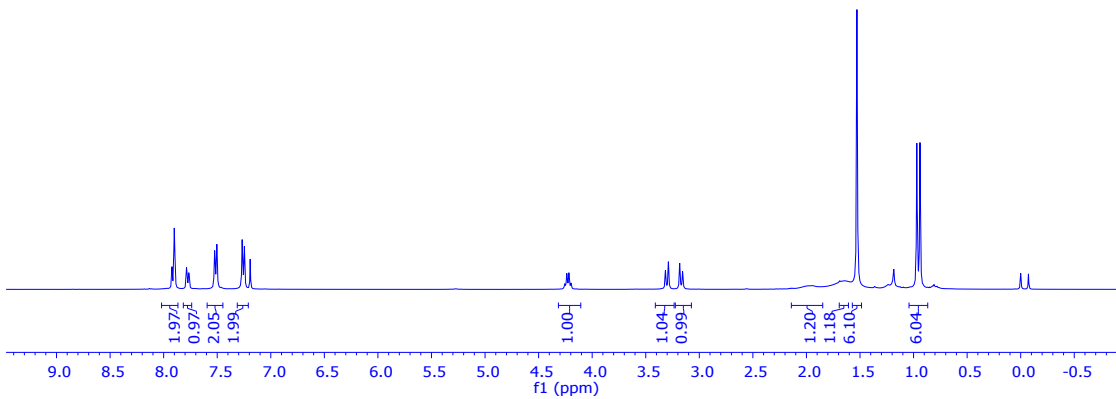

(100.61 MHz, CDCl<sub>3</sub>)

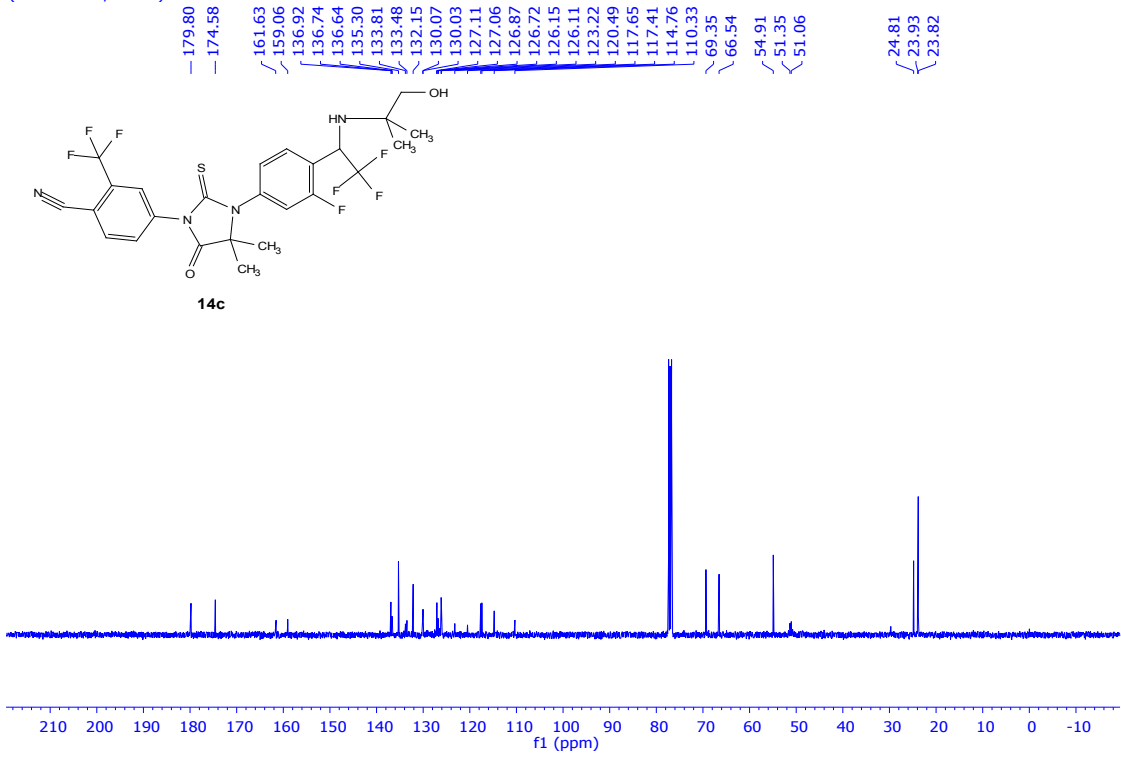

(376.50 MHz, CDCl<sub>3</sub>)

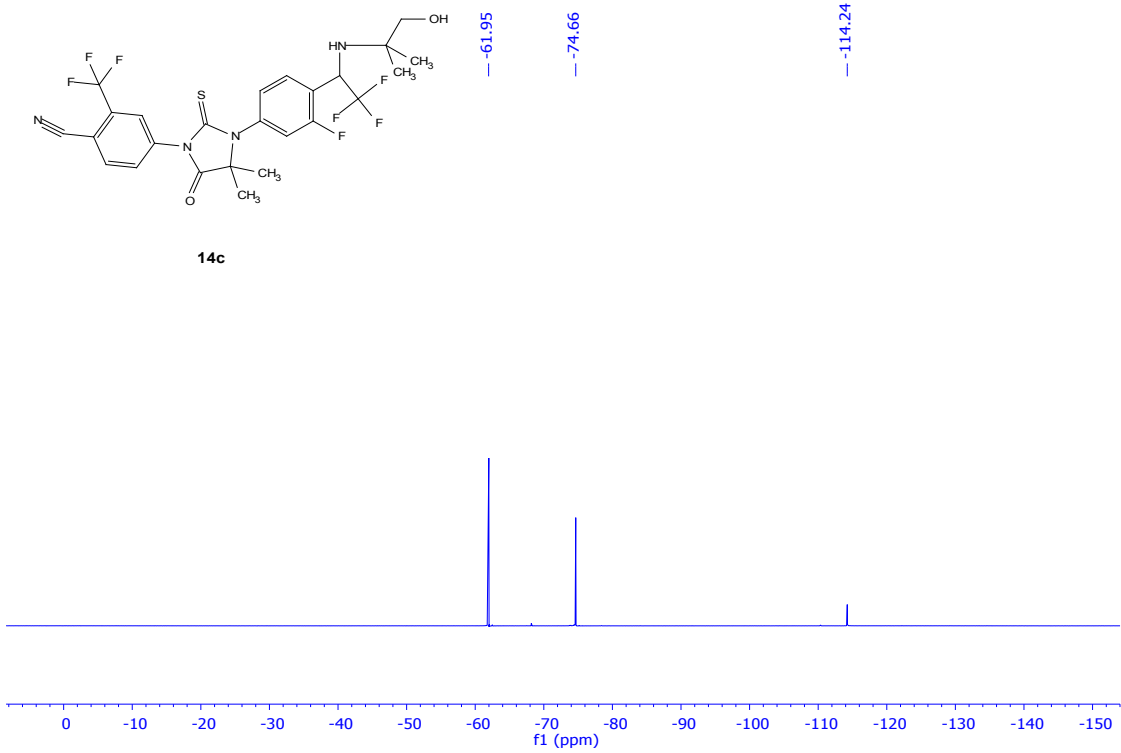

(400.16 MHz, CDCl<sub>3</sub>)

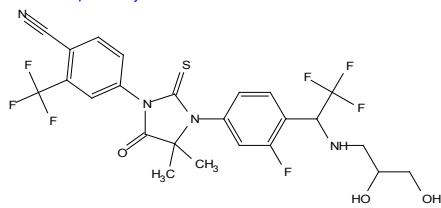

**14d**

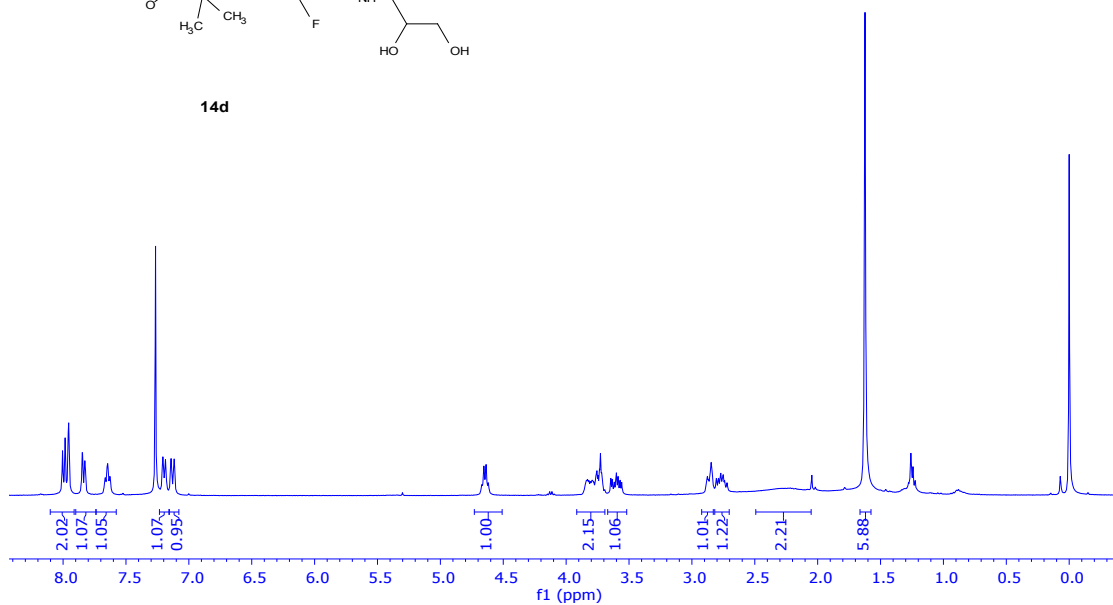

(100.62 MHz, CDCl<sub>3</sub>)

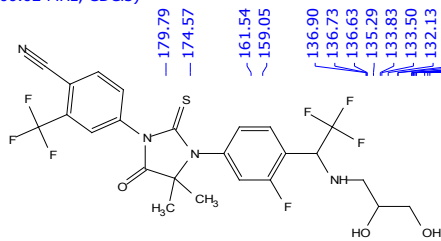

**14d**

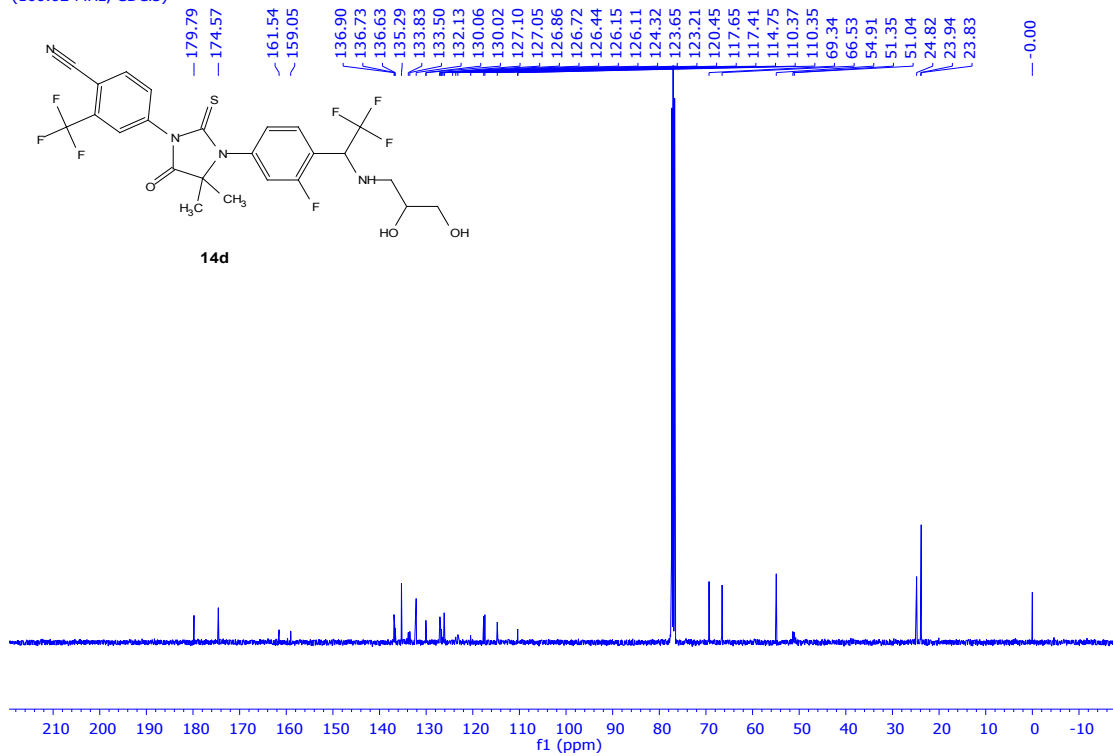

(376.53 MHz, CDCl<sub>3</sub>)

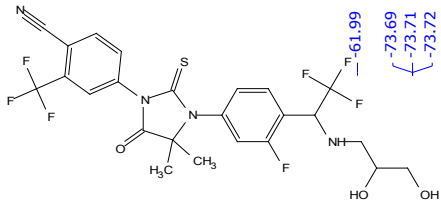

14d

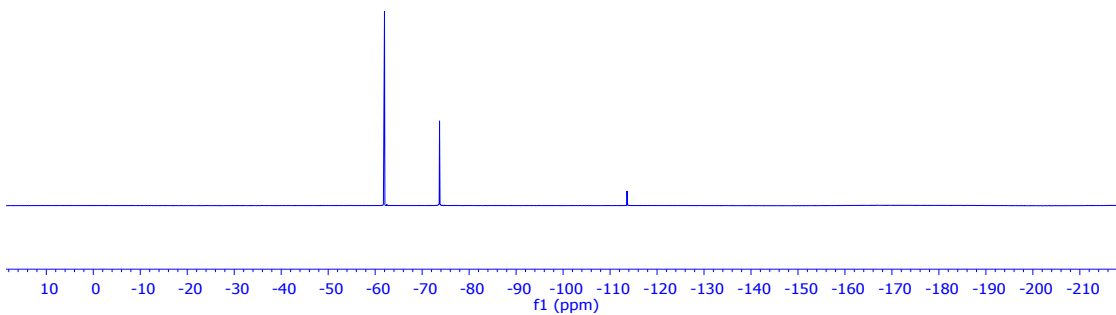

(400.13 MHz, CDCl<sub>3</sub>)

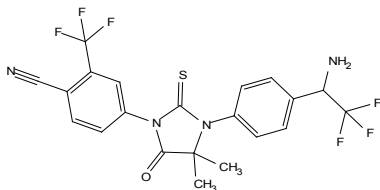

15a

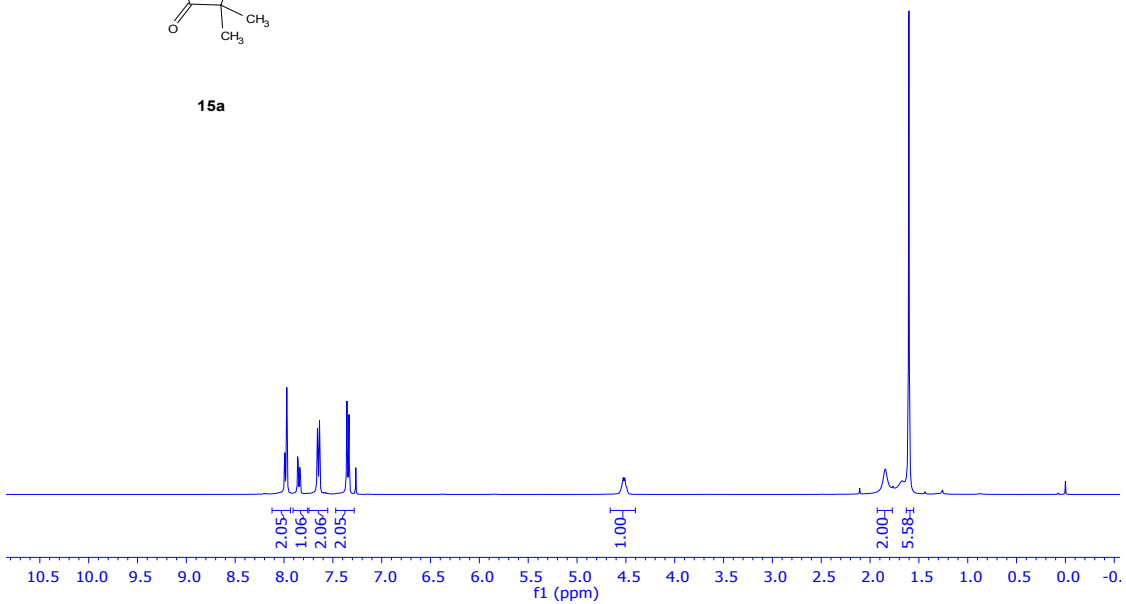

(100.61 MHz, CDCl<sub>3</sub>)

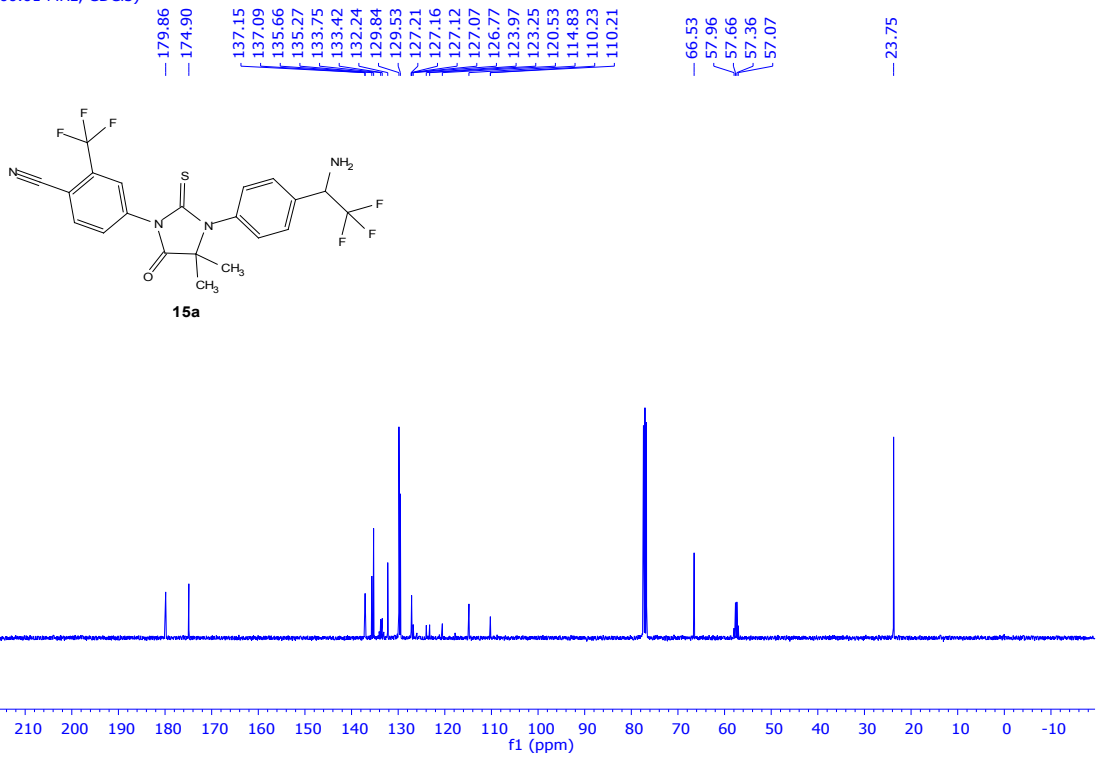

(376.50 MHz, CDCl<sub>3</sub>)

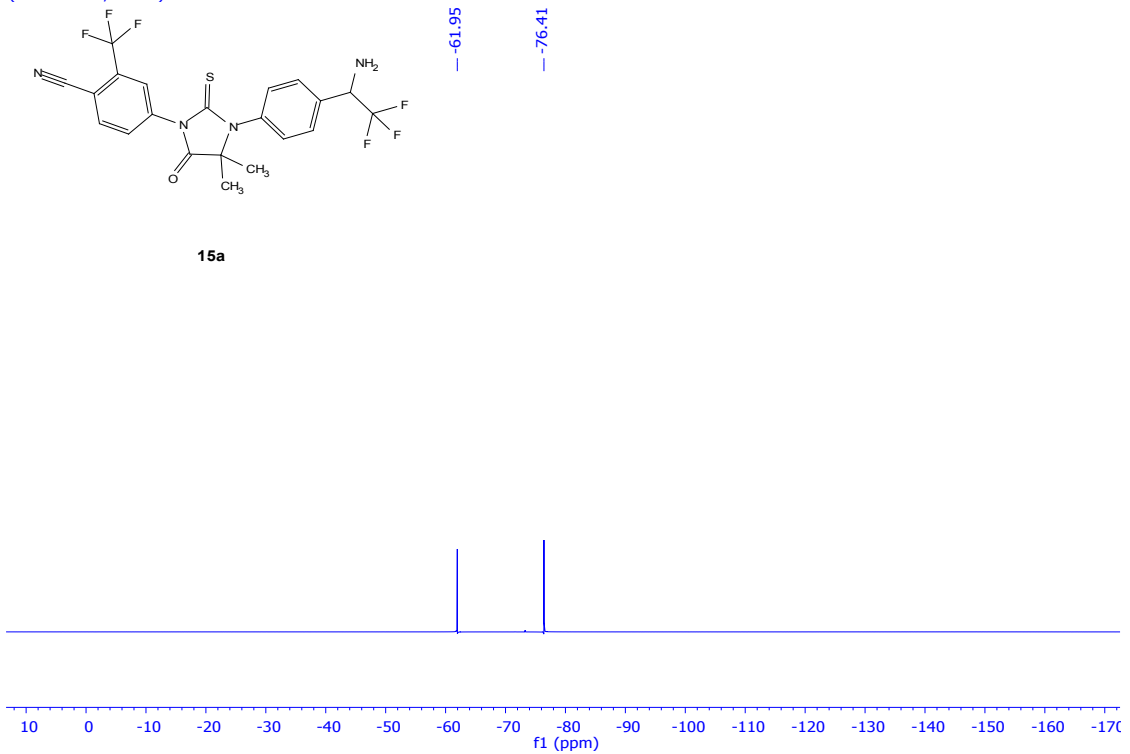

(400.13 MHz, CDCl<sub>3</sub>)

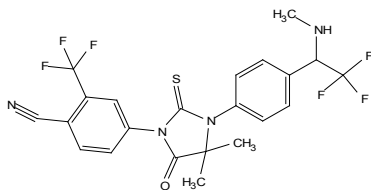

15b

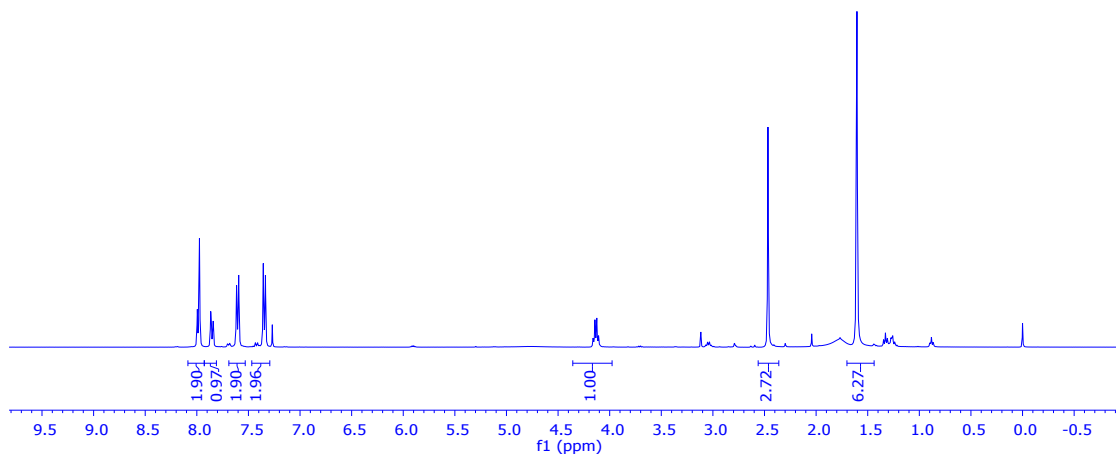

(100.61 MHz, CDCl<sub>3</sub>)

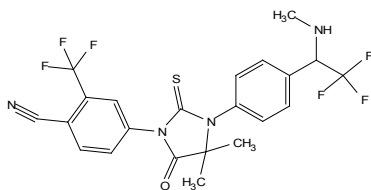

15b

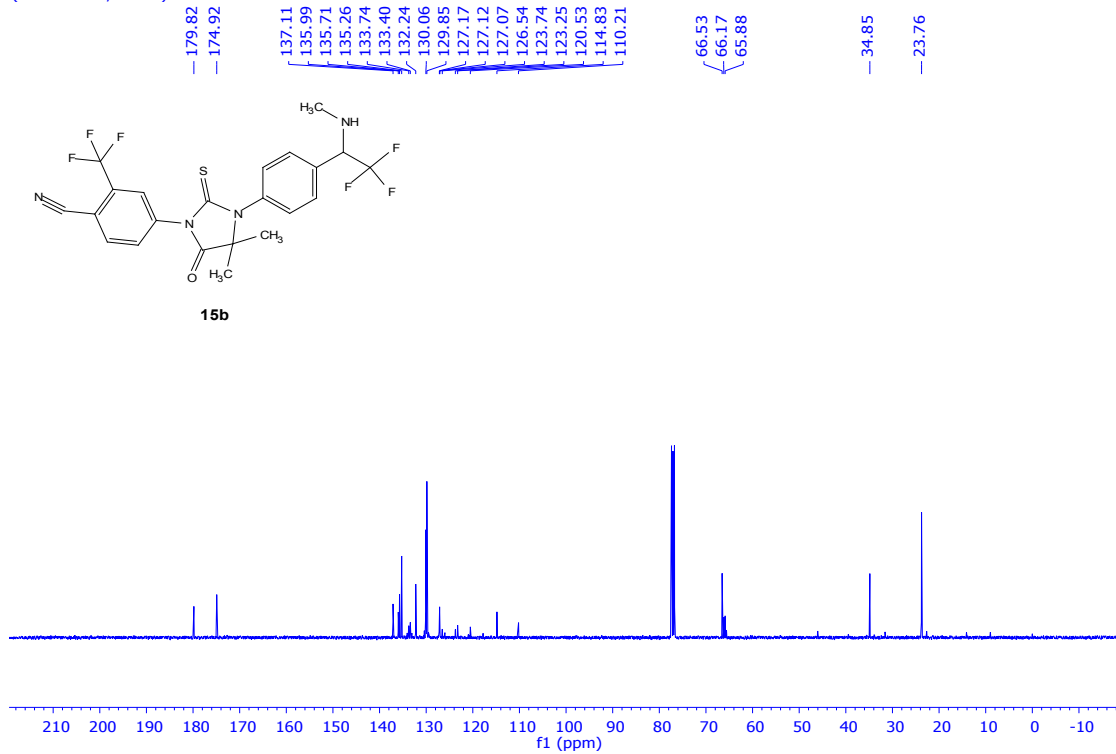



(376.53 MHz, CDCl<sub>3</sub>)

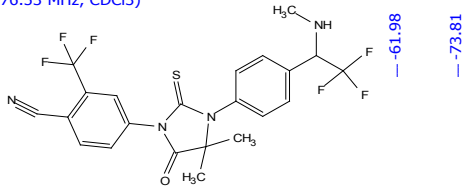

15b

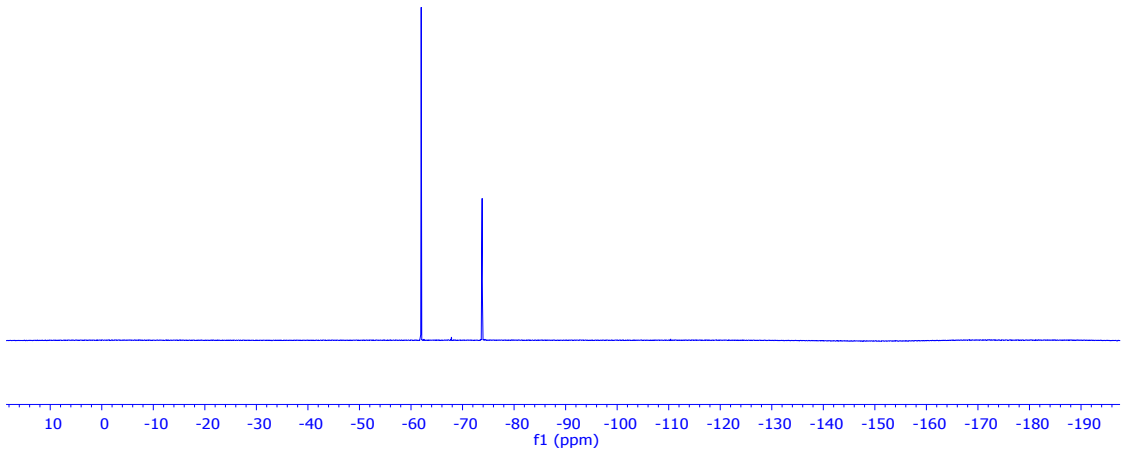

(400.13 MHz, CDCl<sub>3</sub>)

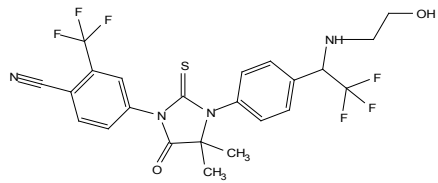

15c

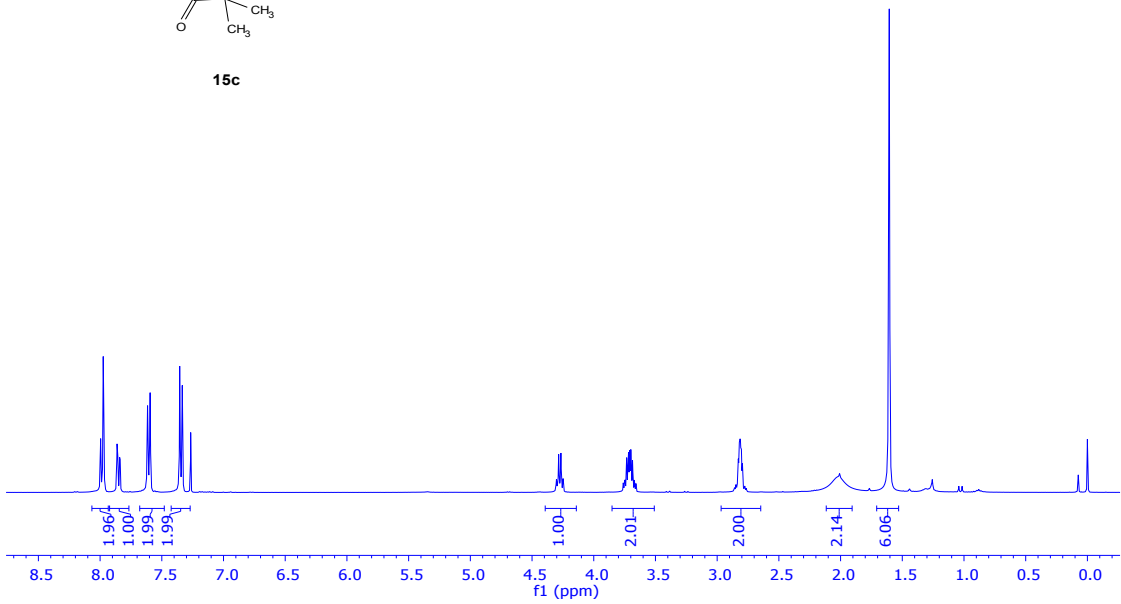

(100.61 MHz, CDCl<sub>3</sub>)

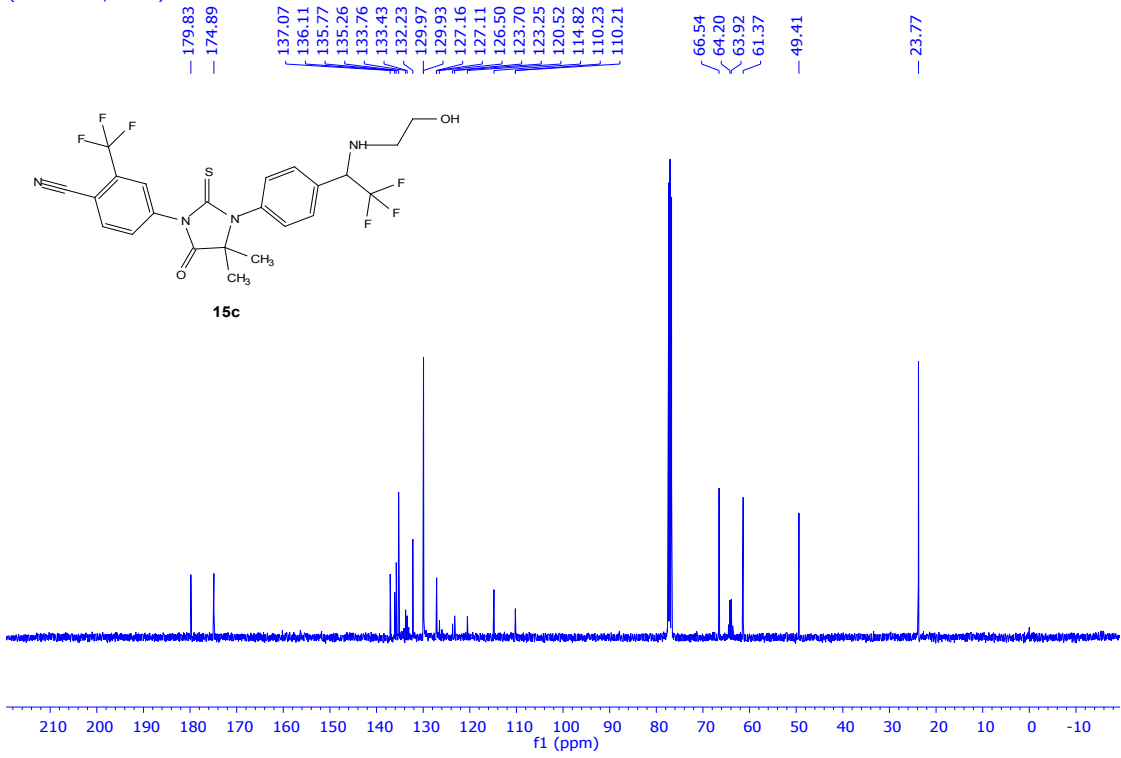

(376.50 MHz, CDCl<sub>3</sub>)

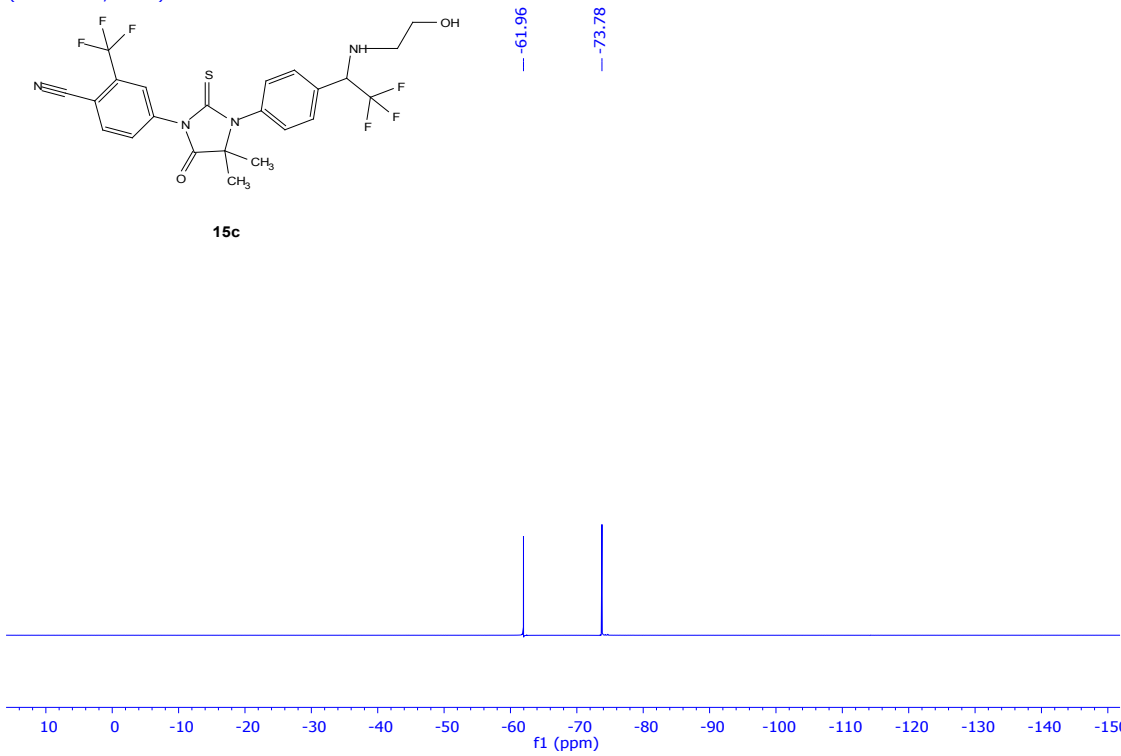

(400.13 MHz, CDCl<sub>3</sub>)

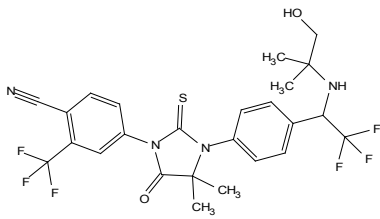

**15d**

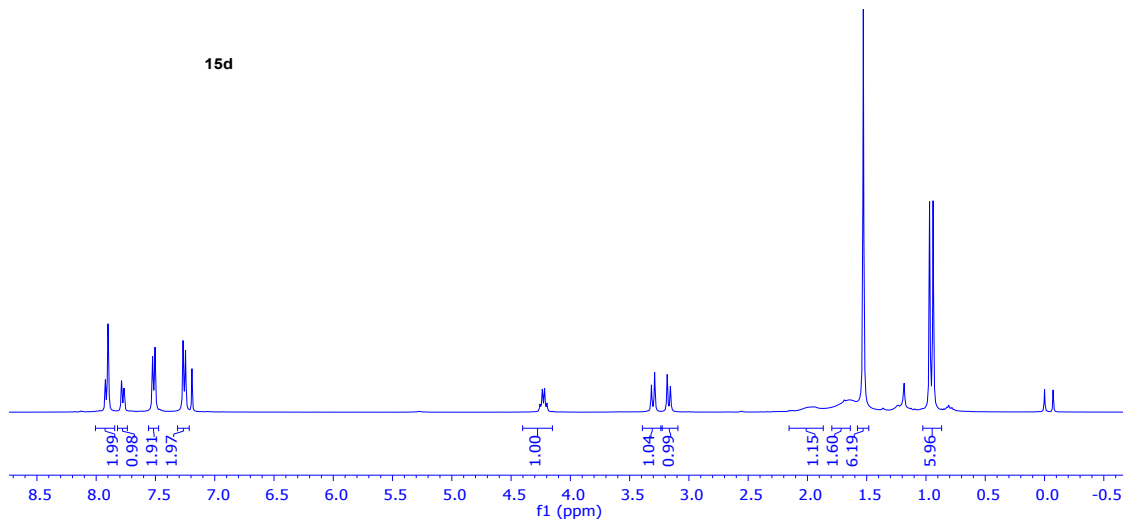

(100.61 MHz, CDCl<sub>3</sub>)

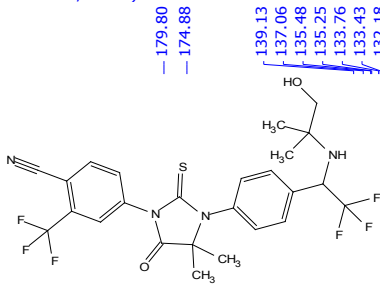

**15d**

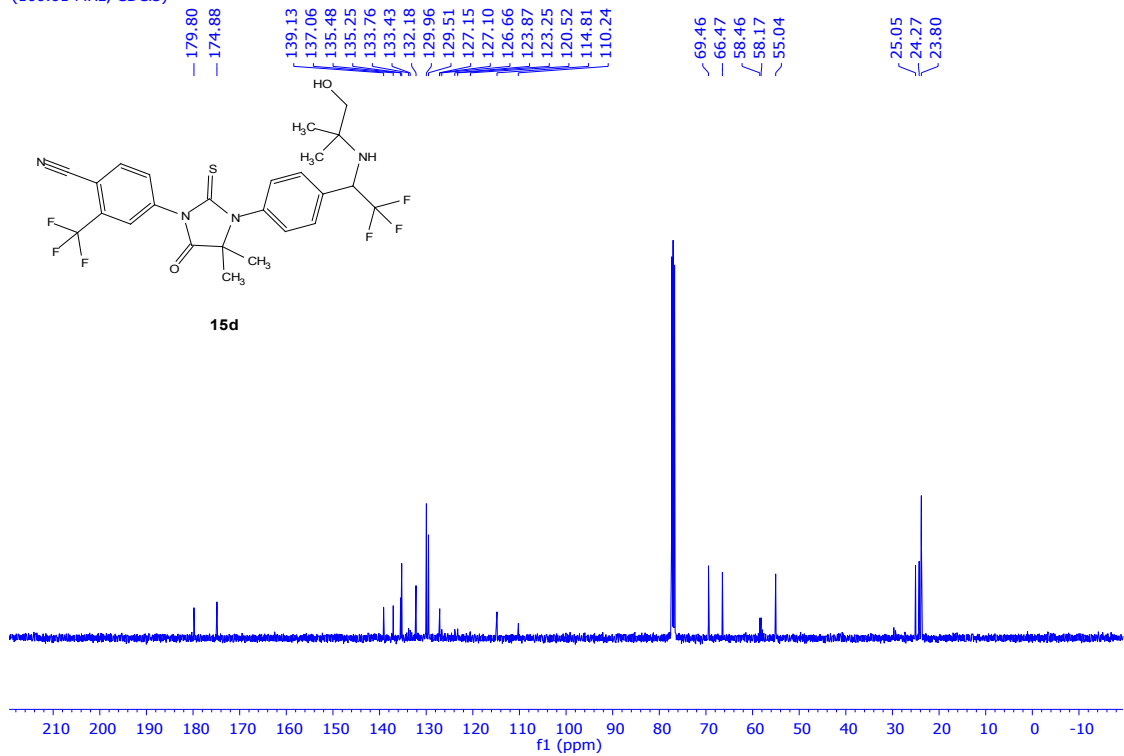

(376.50 MHz, CDCl<sub>3</sub>)

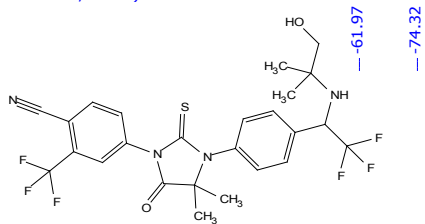

15d

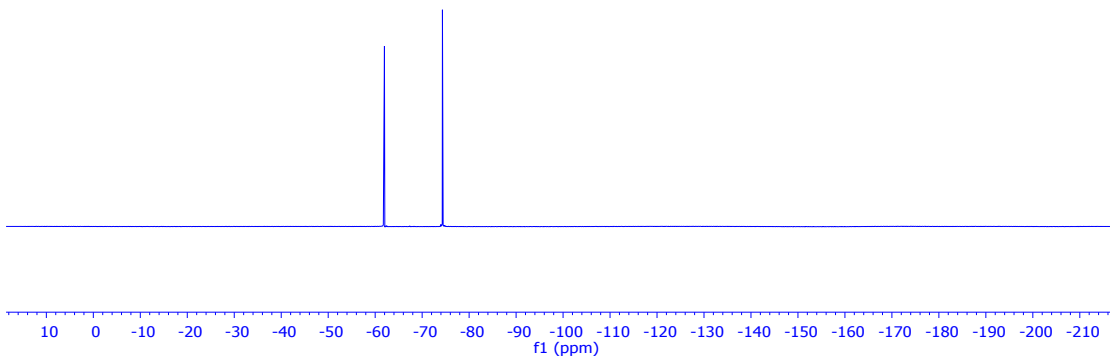

(400.13 MHz, CDCl<sub>3</sub>)

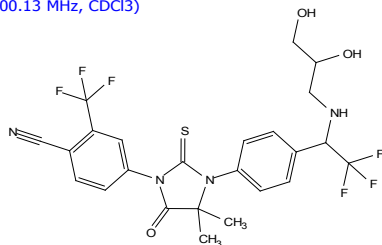

15e

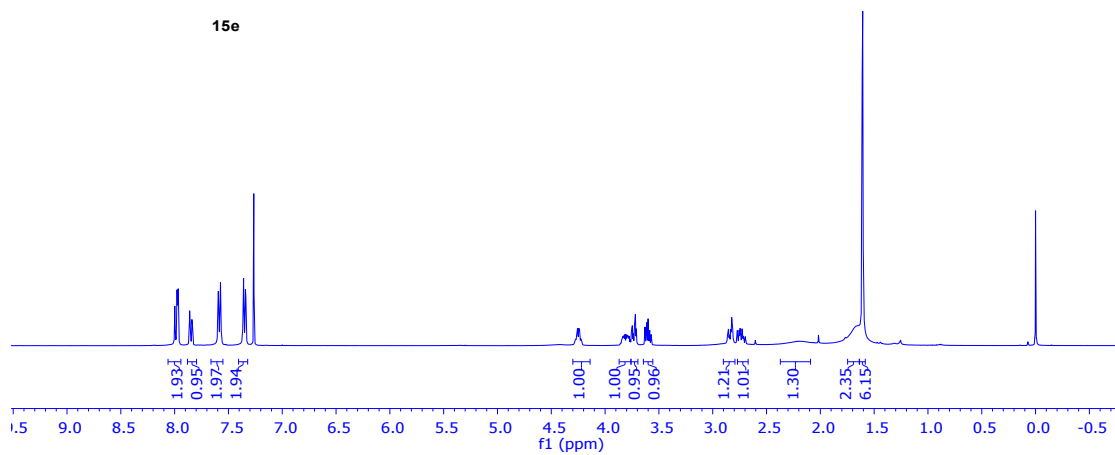

(100.61 MHz, CDCl<sub>3</sub>)

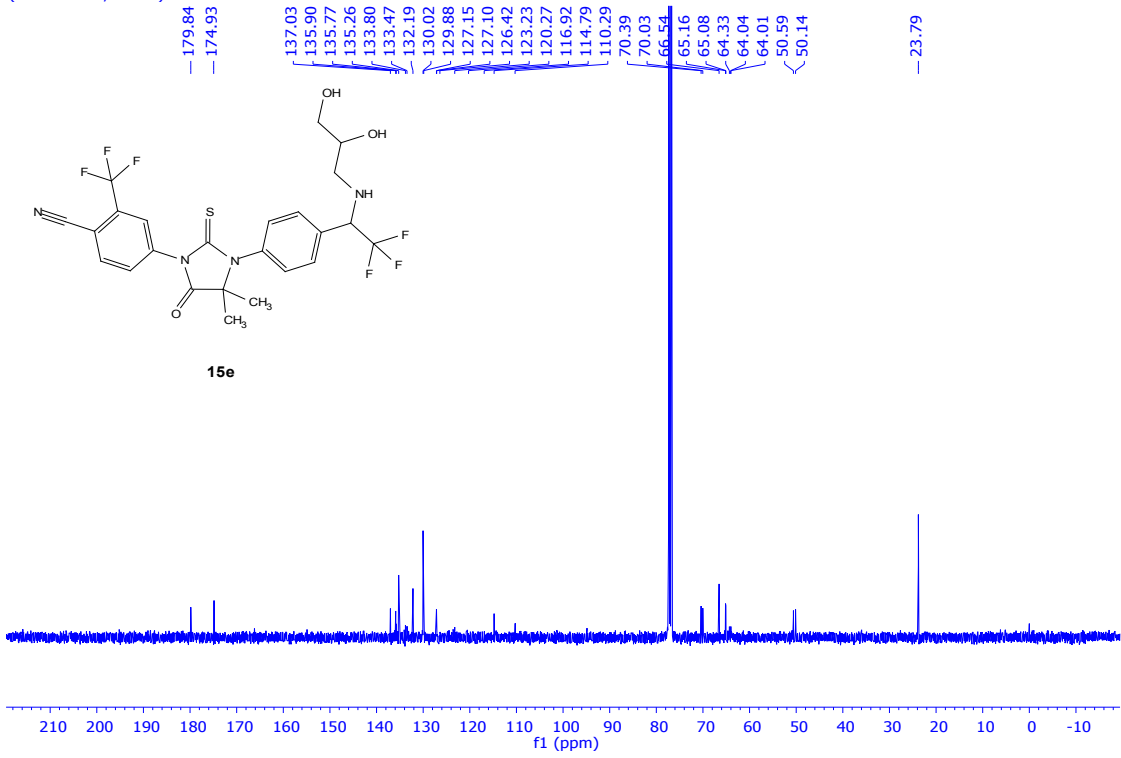

(376.50 MHz, CDCl<sub>3</sub>)

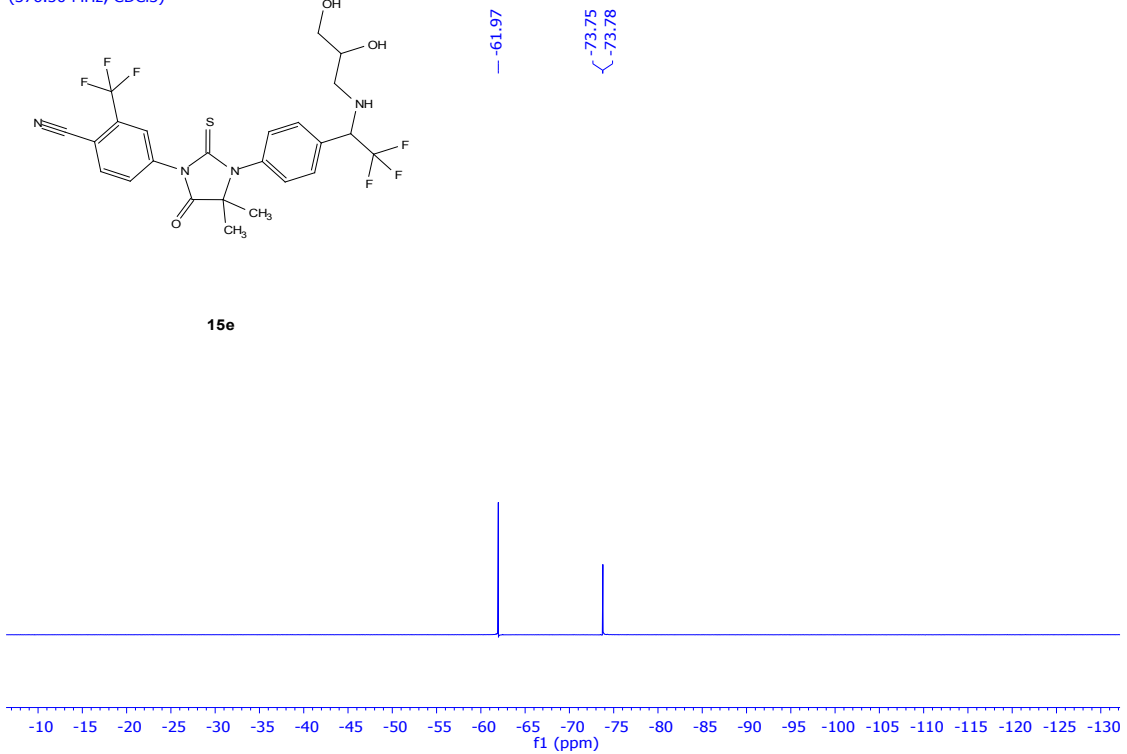

(400.13 MHz, DMSO)

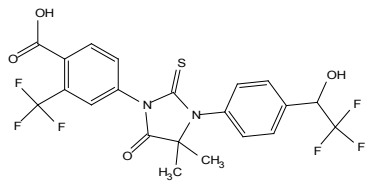

15f

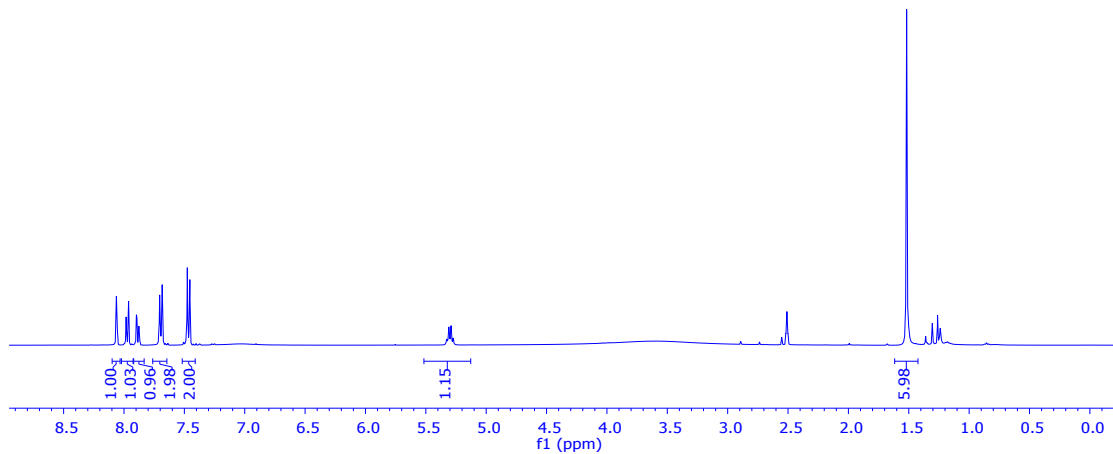

(100.61 MHz, CDCl3)

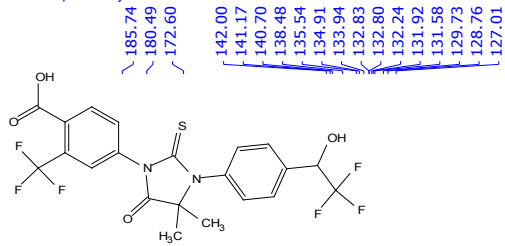

15f

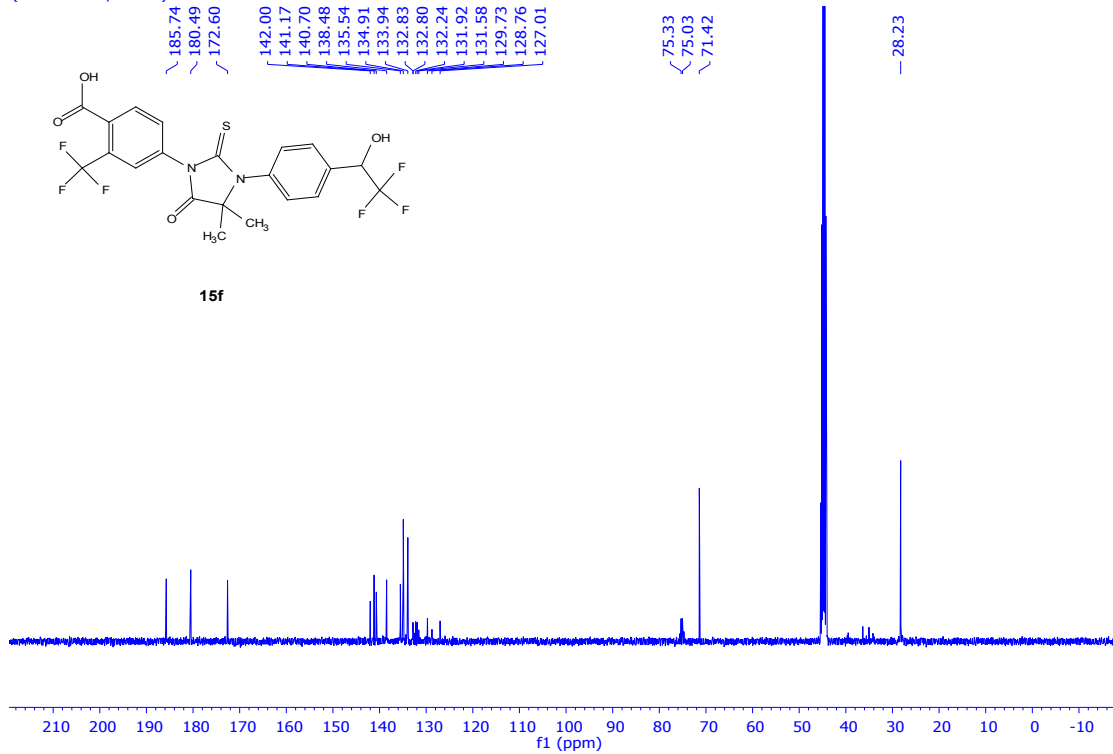

(376.50 MHz, CDCl<sub>3</sub>)

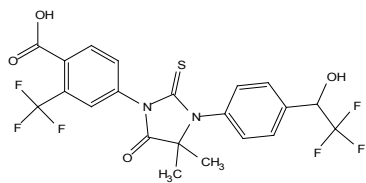

15f

— -53.41

— -71.81

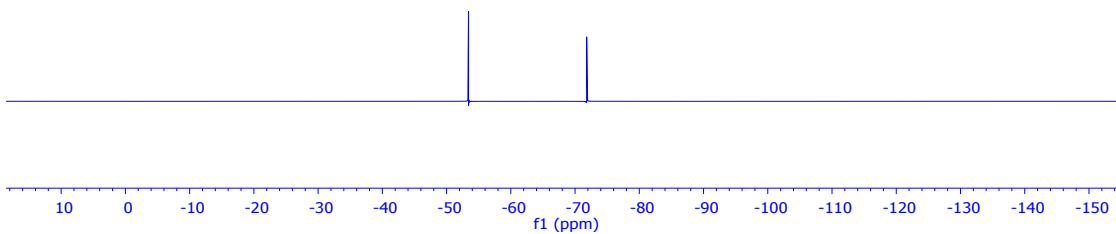

(400.13 MHz, DMSO)

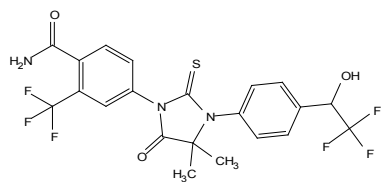

15g

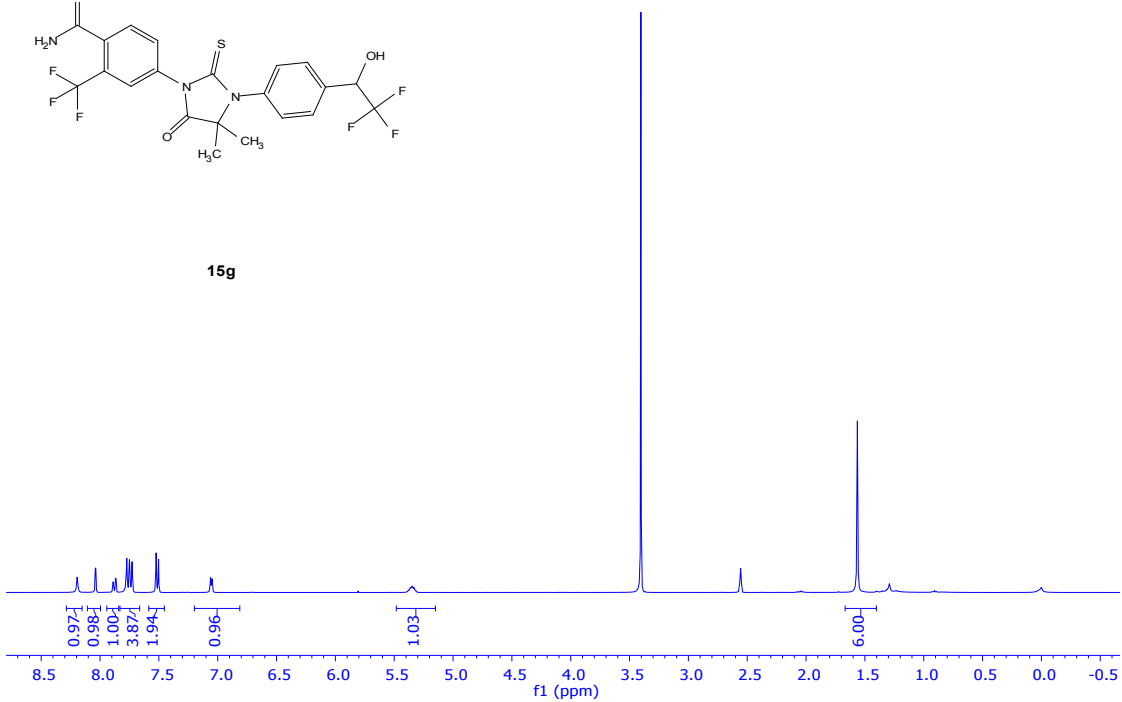

(100.61 MHz, DMSO)

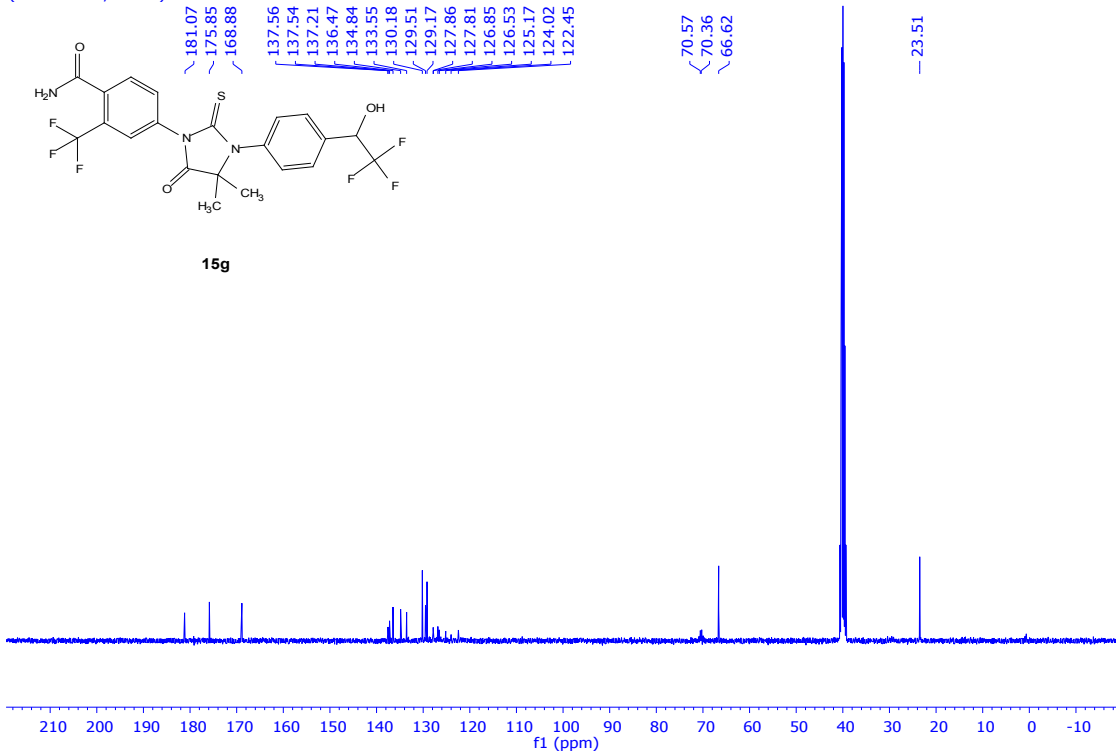

(376.50 MHz, DMSO)

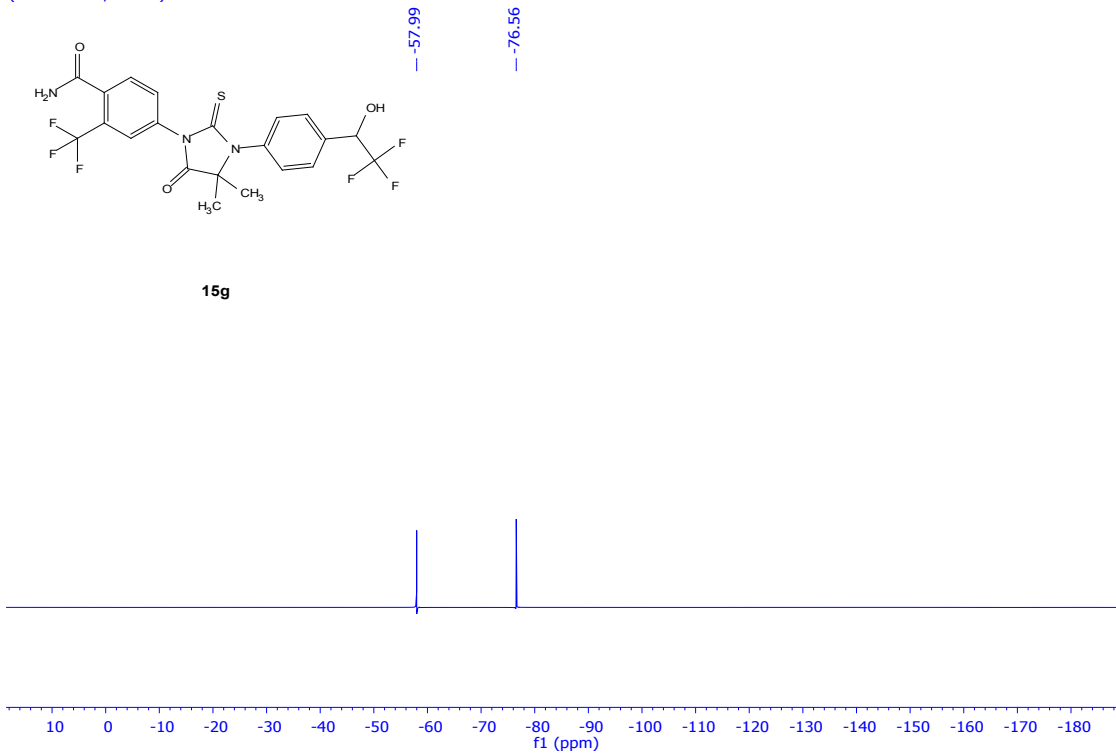



(400.13 MHz, CDCl<sub>3</sub>)

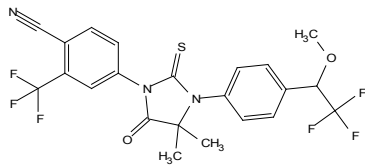

15h

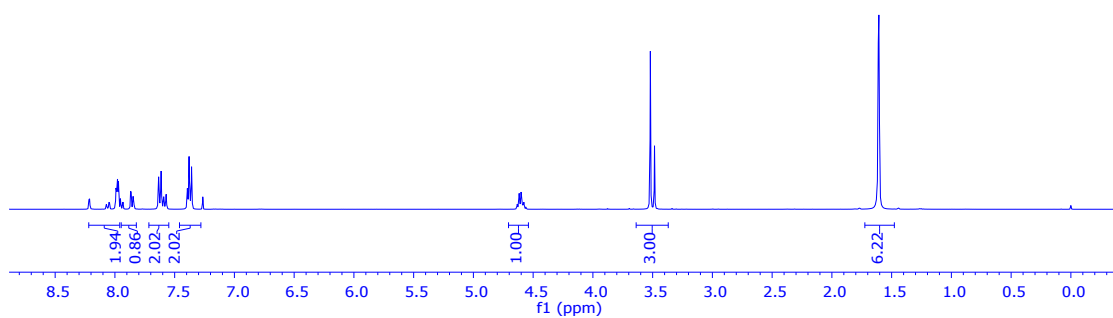

(100.61 MHz, CDCl<sub>3</sub>)

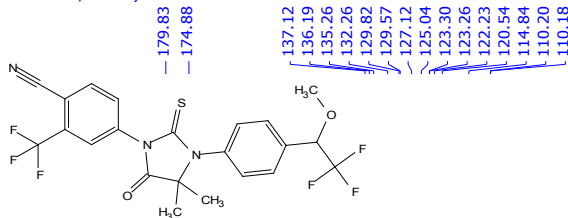

15h

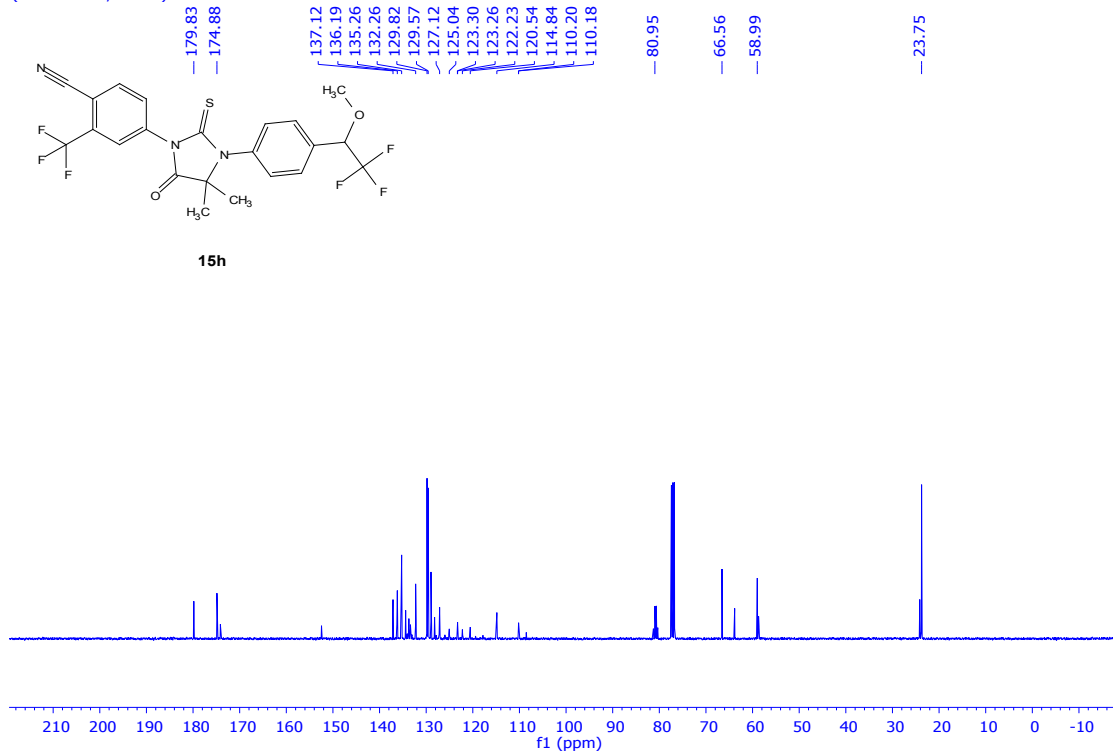

(376.50 MHz, CDCl<sub>3</sub>)

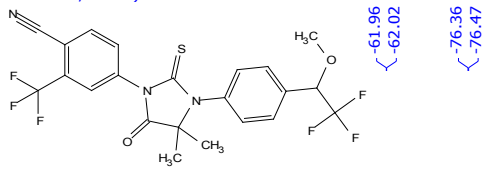

15h

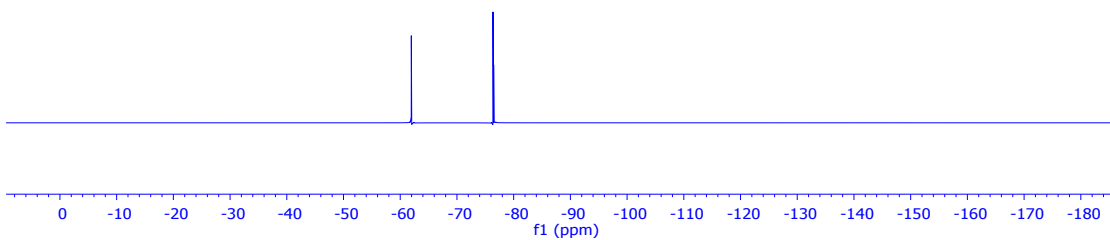

(400.13 MHz, CDCl<sub>3</sub>)

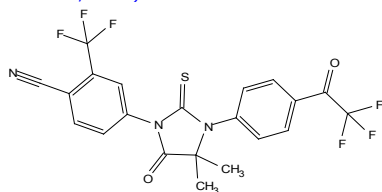

15i

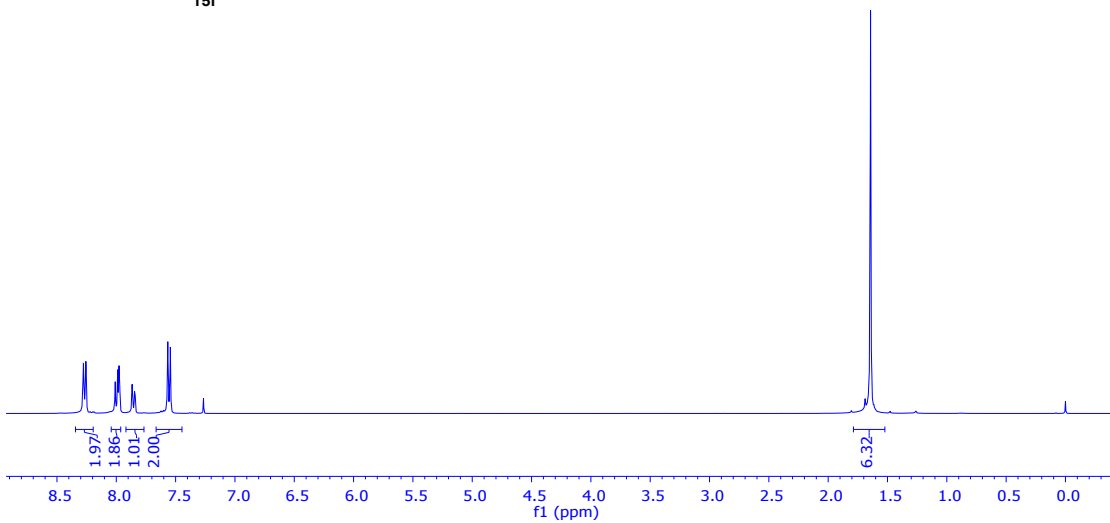

CYW-WYW-16102702 | (100.61 MHz, CDCl<sub>3</sub>)

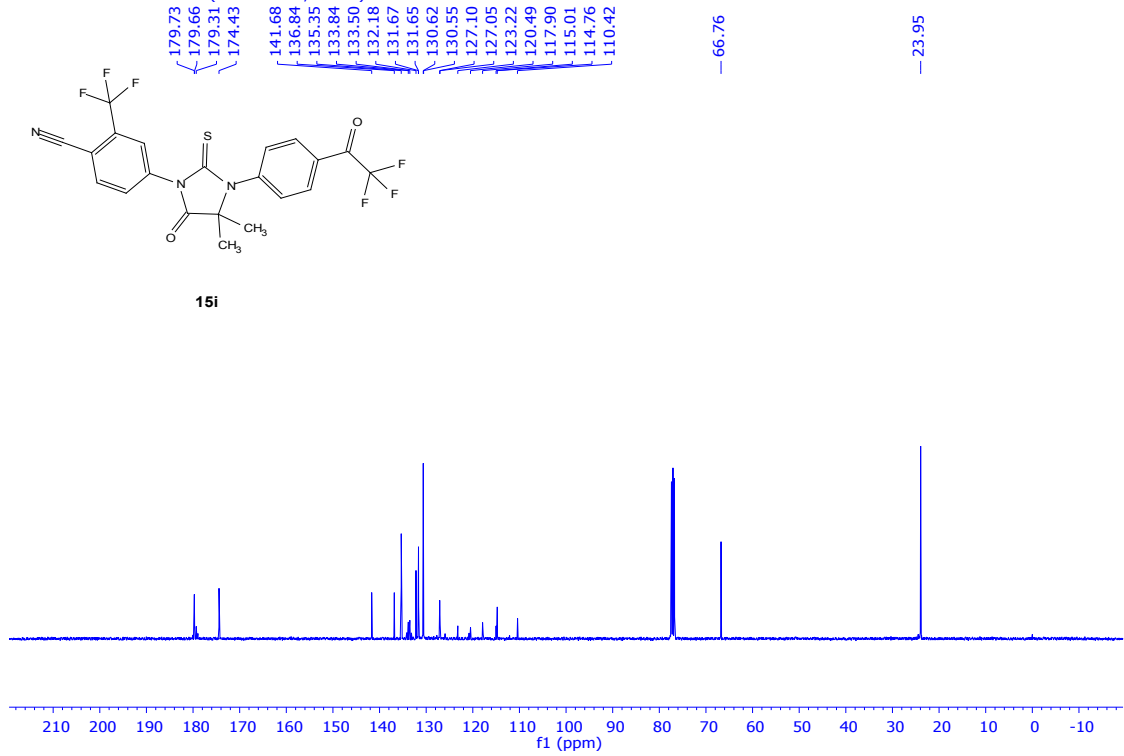

**15i**

(376.50 MHz, CDCl<sub>3</sub>)

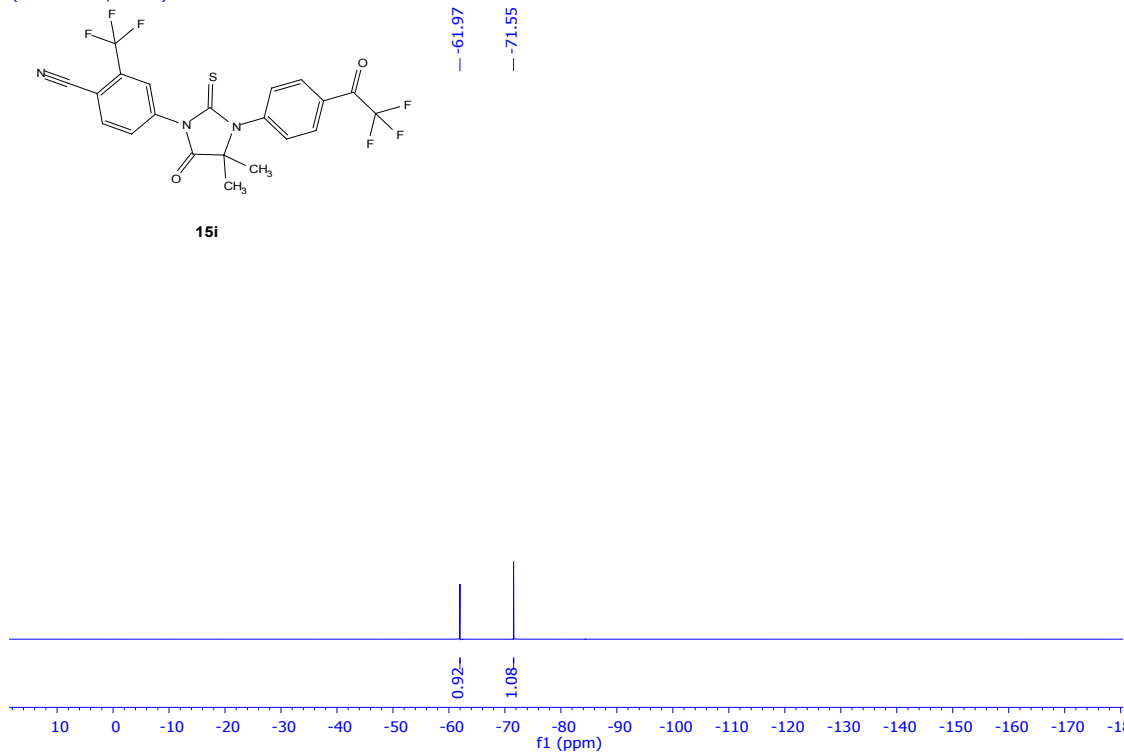

**15i**
